# Supplementary material
Source: PubMed Central journal article supplement (PMC3018764)

**New genetic loci implicated in fasting glucose homeostasis  
and their impact on type 2 diabetes risk**

Josée Dupuis\*, Claudia Langenberg\*, Inga Prokopenko\*, Richa Saxena\*, Nicole Soranzo\*, Anne U Jackson, Eleanor Wheeler, Nicole L Glazer, Nabila Bouatia-Naji, Anna L Gloyn, Cecilia M Lindgren, Reedik Mägi, Andrew P Morris, Joshua Randall, Toby Johnson, Paul Elliott, Denis Rybin, Gudmar Thorleifsson, Valgerdur Steinthorsdottir, Peter Henneman, Harald Grallert, Abbas Dehghan, Jouke Jan Hottenga, Christopher S Franklin, Pau Navarro, Kijoung Song, Anuj Goel, John R B Perry, Josephine M Egan, Taina Lajunen, Niels Grarup, Thomas Sparsø, Alex Doney, Benjamin F Voight, Heather M Stringham, Man Li, Stavroula Kanoni, Peter Shrader, Christine Cavalcanti-Proença, Meena Kumari, Lu Qi, Nicholas J Timpson, Christian Gieger, Carina Zabena, Ghislain Rocheleau, Erik Ingelsson, Ping An, Jeffrey O'Connell, Jian'an Luan, Amanda Elliott, Steven A McCarroll, Felicity Payne, Rosa Maria Roccasecca, François Pattou, Praveen Sethupathy, Kristin Ardlie, Yavuz Ariyurek, Beverley Balkau, Philip Barter, John P Beilby, Yoav Ben-Shlomo, Rafn Benediktsson, Amanda J Bennett, Sven Bergmann, Murielle Bochud, Eric Boerwinkle, Amélie Bonnefond, Lori L Bonnycastle, Knut Borch-Johnsen, Yvonne Böttcher, Eric Brunner, Suzannah J Bumpstead, Guillaume Charpentier, Yii-Der Ida Chen, Peter Chines, Robert Clarke, Lachlan J M Coin, Matthew N Cooper, Marilyn Cornelis, Gabe Crawford, Laura Crisponi, Ian N M Day, Eco de Geus, Jerome Delplanque, Christian Dina, Michael R Erdos, Annette C Fedson, Antje Fischer-Rosinsky, Nita G Forouhi, Caroline S Fox, Rune Frants, Maria Grazia Franzosi, Pilar Galan, Mark O Goodarzi, Jürgen Graessler, Christopher J Groves, Scott Grundy, Rhian Gwilliam, Ulf Gyllensten, Samy Hadjadj, Göran Hallmans, Naomi Hammond, Xijing Han, Anna-Liisa Hartikainen, Neelam Hassanali, Caroline Hayward, Simon C Heath, Serge Hercberg, Christian Herder, Andrew A Hicks, David R Hillman, Aroon D Hingorani, Albert Hofman, Jennie Hui, Joe Hung, Bo Isomaa, Paul R V Johnson, Torben Jørgensen, Antti Jula, Marika Kaakinen, Jaakko Kaprio, Y Antero Kesaniemi, Mika Kivimaki, Beatrice Knight, Seppo Koskinen, Peter Kovacs, Kirsten Ohm Kyvik, G Mark

Lathrop, Debbie A Lawlor, Olivier Le Bacquer, Cécile Lecoeur, Yun Li, Valeriya Lyssenko, Robert Mahley, Massimo Mangino, Alisa K Manning, María Teresa Martínez-Larrad, Jarred B McAteer, Laura J McCulloch, Ruth McPherson, Christa Meisinger, David Melzer, David Meyre, Braxton D Mitchell, Mario A Morken, Sutapa Mukherjee, Silvia Naitza, Narisu Narisu, Matthew J Neville, Ben A Oostra, Marco Orrù, Ruth Pakyz, Colin N A Palmer, Giuseppe Paolisso, Cristian Pattaro, Daniel Pearson, John F Peden, Nancy L. Pedersen, Markus Perola, Andreas F H Pfeiffer, Irene Pichler, Ozren Polasek, Danielle Posthuma, Simon C Potter, Anneli Pouta, Michael A Province, Bruce M Psaty, Wolfgang Rathmann, Nigel W Rayner, Kenneth Rice, Samuli Ripatti, Fernando Rivadeneira, Michael Roden, Olov Rolandsson, Anneli Sandbaek, Manjinder Sandhu, Serena Sanna, Avan Aihie Sayer, Paul Scheet, Laura J Scott, Udo Seedorf, Stephen J Sharp, Beverley Shields, Gunnar Sigurðsson, Erik J G Sijbrands, Angela Silveira, Laila Simpson, Andrew Singleton, Nicholas L Smith, Ulla Sovio, Amy Swift, Holly Syddall, Ann-Christine Syvänen, Toshiko Tanaka, Barbara Thorand, Jean Tichet, Anke Tönjes, Tiinamaija Tuomi, André G Uitterlinden, Ko Willems van Dijk, Mandy van Hoek, Dhiraj Varma, Sophie Visvikis-Siest, Veronique Vitart, Nicole Vogelzangs, Gérard Waeber, Peter J Wagner, Andrew Walley, G Bragi Walters, Kim L Ward, Hugh Watkins, Michael N Weedon, Sarah H Wild, Gonneke Willemsen, Jaqueline C M Witteman, John W G Yarnell, Eleftheria Zeggini, Diana Zelenika, Björn Zethelius, Guangju Zhai, Jing Hua Zhao, M Carola Zillikens, DIAGRAM Consortium, GIANT Consortium, Global BPgen Consortium, Ingrid B Borecki, Ruth J F Loos, Pierre Meneton, Patrik K E Magnusson, David M Nathan, Gordon H Williams, Andrew T Hattersley, Kaisa Silander, Veikko Salomaa, George Davey Smith, Stefan R Bornstein, Peter Schwarz, Joachim Spranger, Fredrik Karpe, Alan R Shuldiner, Cyrus Cooper, George V Dedoussis, Manuel Serrano-Ríos, Andrew D Morris, Lars Lind, Lyle J Palmer, Frank B Hu, Paul W Franks, Shah Ebrahim, Michael Marmot, W H Linda Kao, James S Pankow, Michael J Sampson, Johanna Kuusisto, Markku Laakso, Torben Hansen, Oluf Pedersen, Peter Paul Pramstaller, H Erich Wichmann, Thomas Illig, Igor Rudan, Alan F Wright, Michael Stumvoll, Harry Campbell, James F Wilson, Anders Hamsten on behalf of Procardis consortium, Richard N Bergman, Thomas A Buchanan, Francis S Collins, Karen L Mohlke, Jaakko Tuomilehto, Timo T Valle, David Altshuler, Jerome I Rotter, David S Siscovick, Brenda W J H Penninx, Dorret Boomsma, Panos Deloukas, Timothy D Spector, Timothy M Frayling, Luigi Ferrucci, Augustine Kong, Unnur Thorsteinsdottir, Kari Stefansson, Cornelia M van Duijn, Yuri S Aulchenko, Antonio Cao, Angelo Scuteri, David Schlessinger, Manuela Uda,

Aimo Ruokonen, Marjo-Riitta Jarvelin, Dawn M Waterworth, Peter Vollenweider, Leena Peltonen, Vincent Mooser, Goncalo R Abecasis, Nicholas J Wareham, Robert Sladek, Philippe Froguel, Richard M Watanabe, James B Meigs, Leif Groop, Michael Boehnke, Mark I McCarthy, Jose C Florez, and Inês Barroso  
for the MAGIC investigators

## **SUPPLEMENTARY INFORMATION**

**AUTHOR CONTRIBUTIONS**

**Writing group:** J.Du., C.La., I.Pr., R.Sa., N.S., A.U.J., E.W., N.L.G., N.B.-N., A.L.G., R.Sl., P.F., R.M.W., J.B.Me., L.G., M.Boe., M.I.M., J.C.F., I.B.

**Project design, management and coordination:** (ENGAGE) M.I.M., I.Pr.; (GEM consortium) I.B., C.La., M.Sa., N.J.W.; (CoLaus) V.M., P.V., G.Wa., D.M.W.; (NFBC 1966) P.E., A.-L.H., M.-R.J., M.I.M., L.P., A.P., A.R.; (SardiNIA) G.R.A., A.C., D.S., M.U.; (FHS) J.Du., J.C.F., J.B.Me.; (deCODE) A.K., K.St., U.T.; (Rotterdam ) Y.S.A., A.Ho., A.G.U., J.C.M.W.; (TwinsUK) P.D., N.S., T.D.S.; (NTR/NESDA) D.B., E.dG., B.P.; (CHS) N.L.G., B.M.P., K.R., J.I.R., N.L.S.; (GEMS) P.B., S.G., Y.A.K., R.Ma., R.Mc., V.M., G.Wa., D.M.W.; (DGI) D.A., L.G., R.Sa., B.F.V.; (FUSION) R.N.B., M.Boe., F.S.C., K.L.M., L.J.S., J.Tu., R.M.W.; (ERF) Y.S.A., R.F., B.A.O., K.W.vD., C.M.vD.; (PROCARDIS) R.C., M.G.F., A.Ha., J.F.P., U.Se., H.W.; (InCHIANTI) L.F., T.M.F., D.Mel., G.P.; (BLSA) L.F.; (ORCADES) H.C., J.F.W.; (Sorbs) M.St., A.T.; (Vis) C.Ha., I.R., A.F.W.; (KORA) T.I., H.E.W.; (MICROS) A.A.H., P.P.P.; (ARIC) J.S.P., W.H.L.K; (Health 2000) L.P., V.Sa., K.Si.; (Danish) K.B.-J., T.Jø, A.Sa., T.H, O.Pe.; (METSIM) J.Ku., M.La.; (WhiteHall II) A.D.H., M.Ki., M.Ku., M.Mar.; (BHS) L.J.P.; (BWHHS) S.E., D.A.L.; (BotniaPPP) L.G.; (Umeå) P.W.F.; (ULSAM and PIVUS) E.I.; (UKT2DGC) A.D.M; (Segovia) M.S.-R.; (GENDAI and GHRAS) G.V.D.; (Hertfordshire) C.C., A.A.S, H.S.; (Ely) N.J.W., C.La.; (NHANES) J.B.Me; (DIAGEN) P.Schw., S.R.B.; (MesyBePo) A.F.H.P., J.S.; (CaPS) G.D.S., Y.B.-S., J.W.G.Y.; (EFSOCH) T.M.F., A.T.H.; (WASHS) S.M., L.J.P.; (French) N.B.-N., P.F., R.Sl.; (Partners/Roche) D.M.N., G.H.W., J.B.Me.; (Amish) A.R.S.; (SUVIMAX) P.M.; (Fenland) N.G.F., C.La., R.J.F.L., N.J.W.; (FAMHS) I.B.B., M.A.P.; (GenomEUtwin) D.B., J.Ka., K.O.K., P.K.E.M., N.L.P.; (Norfolk Diabetes Case Control Study) M.J.S.; (NHS/HPFS) F.B.H.; (Expression) A.L.G., F.Pat.

**Sample collection and phenotyping:** (CoLaus) P.V., G.Wa.; (NFBC 1966) A.-L.H., M.-R.J., A.P., A.R., N.V.; (SardiNIA) A.C., L.C., S.N., M.O., A.Sc.; (FHS) J.B.Me., C.S.Fo.; (deCODE) R.B., G.S., V.St.; (Rotterdam) P.H., A.Ho., E.J.G.S., J.C.M.W., M.C.Z.; (TwinsUK) M.Man., T.D.S., G.Z.; (NTR/NESDA) N.V., G.Wi.; (CHS) B.M.P., D.S.S, N.L.S.; (GEMS) P.B., S.G., Y.A.K., R.Ma., R.Mc., V.M., G.Wa.; (DGI) L.G., V.L., B.I., T.Tu.; (FUSION) R.N.B., T.A.B., J.Tu., T.T.V.; (ERF) P.H., K.W.vD.; (PROCARDIS) R.C., M.G.F., A.Ha., U.Se., A.Sil.; (BLSA) J.M.E.; (ORCADES) S.H.W., J.F.W.; (Sorbs) P.K., A.T.; (Vis) O.Po., I.R.; (KORA) C.He., C.M., B.T., W.R., M.R.; (MICROS) I.Pi.; (Health2000) A.J., S.Ko., V.Sa.; (Danish) K.B.-J., T.Jø, A.Sa., T.H, O.Pe.; (METSIM) J.Ku., M.La.; (WhiteHall II) E.Br., M.Ku., M.Mar.; (BHS) J.Hun.; (BWHHS) S.E., D.A.L.; (BotniaPPP) L.G., B.I., V.L., T.Tu.; (Umeå) P.W.F., G.H., O.R.; (UKT2DGC) A.Do., A.D.M, C.P.; (Segovia) M.T.M.-L., M.S.-R.; (GENDAI and GHRAS) S.Ka.; (Hertfordshire) C.C., A.A.S, H.S.; (Amish) A.R.S.; (Ely) N.J.W.; (NHANES) J.C.F., J.B.Me.; (OBB) F.K., M.J.N.; (MesyBePo) A.F.R., J.S.; (DIAGEN) J.G., P.Schw.; (CaPS) Y.B.-S., J.W.G.Y.; (ULSAM) L.L., B.Z.; (PIVUS) L.L.; (EFSOCH) B.K.; (WASHS) A.C.F., D.R.H., S.M., L.S., K.L.W.; (French) B.B., G.Ch., P.F., S.Ha., D.Mey., J.Ti., S.V.-S.; (Partners/Roche) J.B.Me., D.M.N., G.H.W.; (SUVIMAX) P.G., S.He.; (Fenland) N.G.F., R.J.F.L., N.J.W.; (Norfolk Diabetes Case Control Study) M.J.S.; (NHS/HPFS) F.B.H.; (Eurospan) U.G.; (GenomEUtwin) G.Wi.

**Genotyping:** (CoLaus) S.B., M.Boc., V.M., D.M.W.; (NFBC 1966) M.-R.J. L.P.; (FHS) J.Du., C.S.Fo.; (deCODE) V.St., U.T., G.B.W.; (Rotterdam ) F.R., A.G.U.; (TwinsUK) R.G., S.C.P., N.S.; (CHS) Y.-D.I.C., M.O.G., J.I.R.; (GEMS): V.M., D.M.W.; (DGI) D.A., K.A., V.L., R.Sa.; (FUSION) L.L.B., M.R.E.; (ERF) Y.A.; (PROCARDIS) G.M.L., A.-C.S.; (InCHIANTI) A.Sin.; (BLSA) A.Sin.; (ORCADES) H.C., J.F.W.; (Sorbs) Y.B., P.K.; (Vis) C.Ha., V.V.; (KORA) H.G., T.I.. M.R.; (ARIC) E.Bo.; (METSIM) M.A.M., N.N.; (WhiteHall II) M.Ku., C.La., N.J.W.; (BWHHS) I.N.M.D., S.E., D.A.L., N.J.T.; (BotniaPPP) G.Cr.; (Umeå) I.B., S.J.B., F.Pay.; (ULSAM and PIVUS) A.-C.S.;

(Segovia) M.T.M.-L., M.S.-R., C.Z.; (GENDAI and GHRAS) C.J.G.; (Hertfordshire) I.B., S.J.B., F.P., N.J.W.; (Amish) R.P.; (TwinsUK replication) S.J.B., N.Ham., D.V.; (Ely) I.B., S.J.B., F.P., N.J.W.; (NHANES) J.C.F., J.B.McA.; (OBB) M.J.N.; (DIAGEN) D.Pe., A.Sw.; (CaPS) I.N.M.D., N.J.T.; (FUSION stage 2) P.C., A.Sw.; (Health2000) K.Si., P.J.W.; (Danish) N.G., T.S., T.H., O.Pe.; (French) A.B., J.De., D.Mey., G.R., R.Sl.; (Partners/Roche) J.C.F., J.B.McA.; (SUVIMAX) G.M.L., D.Z.; (Fenland) R.J.F.L., N.J.W.; (Oxford replication) A.J.B., C.J.G.; (BHS) J.P.B., J.Hui; (WTCCC/UKT2DGC) N.Has.; (NHS/HPFS) F.B.H.; (Eurospan) U.G.

**Statistical analysis:** (Meta-analyses) J.Du., C.La., C.M.L., R.Mä., A.P.M., I.Pr., J.R., D.R.; (CoLaus) S.B., M.Boc., T.Jo., K.So.; (NFBC 1966) L.J.M.C., M.Ka., I.Pr., U.So.; (SardiNIA) G.R.A., X.H., S.S., P.Sche.; (FHS) J.Du., A.K.M., D.R.; (deCODE) V.St., G.T.; (Rotterdam) Y.S.A., A.De., P.H., M.vH.; (TwinsUK) N.S.; (NTR/NESDA) J.-J.H., D.Po.; (CHS) N.L.G., K.R.; (GEMS) K.So.; (DGI) A.E., S.M., R.Sa., B.F.V.; (FUSION) A.U.J., Y.L., P.Se.; (ERF) Y.S.A., P.H., P.N.; (PROCARDIS) A.G., J.F.P.; (InCHIANTI) J.R.B.P.; (BLSA) T.Ta.; (ORCADES) C.S.Fr., P.N.; (Sorbs) T.L., I.Pr.; (Vis) C.S.Fr., P.N., V.V.; (KORA) C.G., H.G.; (MICROS): C.S.Fr., P.N., C.P.; (ARIC) M.Li.; (METSIM, DIAGEN, FUSION stage 2) A.U.J., H.M.S.; (WhiteHall II) C.La.; (BWHHS, CaPS) N.J.T.; (BotniaPPP) V.L., R.Sa.; (Partners/Roche) P.Sh.; (Umeå) P.W.F.; (ULSAM and PIVUS) E.I.; (UKT2DGC) I.Pr., N.W.R.; (Segovia) M.T.M.-L., M.S.-R., C.Z.; (GENDAI, GHRAS, OBB) I.Pr.; (Hertfordshire) C.La.; (Amish) J.O., B.D.M.; (Ely) C.La., S.J.S.; (NHANES) P.Sh.; (MesyBePo) A.F.R., J.S.; (Health2000) M.P., K.Si., P.J.W.; (EFSOCH) B.S., M.N.W.; (French) N.B.-N., C.C.-P., C.D., C.Le., G.R., A.W.; (SUVIMAX) S.J.H., T.Jo.; (Fenland) C.La., J.L., J.H.Z.; (Oxford replication) N.W.R.; (WTCCC/UKT2DGC) E.Z.; (NHS/HPFS) M.C., L.Q.; (BWS, WASHS) M.N.C., L.J.P.; (FamHS) P.A.; (Danish) N.G., T.S.; (GenomEUtwin) J.J.H.

**Expression analysis:** F.Pay., R.M.R., A.L.G., P.R.V.J., L.J.M., N.B.-N., O.L., F.Pat.

**Lipids analysis:** Y.S.A., S.R., C.M.vD.

**ACKNOWLEDGMENTS**

Replication genotyping was supported in part by Diabetes UK grant RD08/0003704. We thank Christopher D'Avella and Michelle Gaffney for excellent clerical assistance in the submission of this manuscript.

**Expression analyses:** A.L.G. is a Medical Research Council (MRC) New Investigator. Expression analysis was funded in Oxford by the MRC (81696) and Diabetes UK. Our French colleagues thank Bruno Lukowiak for RNA and cDNA preparation from sorted  $\beta$  cells, and Cédric Bernand for assistance in the preparation of the quantitative PCRs.

**Amish:** The Amish research studies were supported by the National Institutes of Health (NIH) research grant R01 DK54261 and U01 HL72515, Baltimore Diabetes Research and Training Center, Grant P60 DK079637, the University of Maryland General Clinical Research Center, Grant M01 RR 16500, the Johns Hopkins University General Clinical Research Center, Grant M01 RR 000052, General Clinical Research Centers Program, National Center for Research Resources (NCRR), NIH, and the Baltimore Veterans Administration Geriatric Research and Education Clinical Center (GRECC). We gratefully acknowledge the Amish liaisons, fieldworkers, and the extraordinary cooperation and support of the Amish Community, without whom these studies would not be possible.

**The Atherosclerosis Risk in Communities Study (ARIC)** is carried out as a collaborative study supported by National Heart, Lung, and Blood Institute contracts N01-HC-55015, N01-HC-55016, N01-HC-55018, N01-HC-55019, N01-HC-55020, N01-HC-55021, N01-HC-55022, R01HL087641, R01HL59367 and R01HL086694; National Human Genome Research Institute contract U01HG004402; and National Institutes of Health contract HHSN268200625226C. The authors thank the staff and participants of the ARIC study for their important



contributions. Infrastructure was partly supported by Grant Number UL1RR025005, a component of the National Institutes of Health and NIH Roadmap for Medical Research.

**BHS:** The 1994-1995 Busselton Health Survey was funded by Healthway, Western Australia. The Busselton Health Studies are supported by the National Health and Medical Research Council of Australia and the Great Wine Estates Auctions. The BHS acknowledges the support of the Western Australian Genetic Epidemiology Resource and the Western Australian DNA Bank (both National Health and Medical Research Council of Australia Enabling Facilities).

**BLSA:** A portion of that support was through a R&D contract with MedStar Research Institute, and the Intramural Research Program of the NIH, National Institute on Aging.

**BWHHS:** The British Women's Heart & Health Study receives core funding from the the UK Department of Health Policy Research Programme and the British Heart Foundation. A project grant from the British Heart Foundation supported DNA extraction. We thank all of the research nurses and staff who contributed to data collection and entry, the GP surgeries that supported recruitment of participants, and the women who participated in the study.

**Caerphilly Prospective study (CaPS):** The Caerphilly Prospective study was conducted by the former MRC Epidemiology Unit (South Wales) and funded by the Medical Research Council of the United Kingdom. The DNA databank was set up with a project grant from the Medical Research Council.

**CHS:** The CHS research reported in this article was supported by contract numbers N01-HC-85079 through N01-HC-85086, N01-HC-35129, N01 HC-15103, N01 HC-55222, N01-HC-75150, N01-HC-45133, grant numbers U01 HL080295 and R01 HL087652 from the National Heart, Lung, and Blood Institute, with additional contribution from the National Institute of

Neurological Disorders and Stroke. A full list of principal CHS investigators and institutions can be found at <http://www.chs-nhlbi.org/pi.htm>. DNA handling and genotyping was supported in part by National Center for Research Resources grant M01RR00069 to the Cedars-Sinai General Clinical Research Center Genotyping core and National Institute of Diabetes and Digestive and Kidney Diseases grant DK063491 to the Southern California Diabetes Endocrinology Research Center.

**CoLaus:** The CoLaus study was supported by research grants from GlaxoSmithKline, from the Swiss National Science Foundation (Grant number 33CSO-122661) and from the Faculty of Biology and Medicine of Lausanne, Switzerland. We thank Yolande Barreau, Mathieu Firmann, Vladimir Mayor, Anne-Lise Bastian, Binasa Ramic, Martine Moranville, Martine Baumer, Marcy Sagette, Jeanne Ecoffey and Sylvie Mermoud for data collection. Finally we would like to express our gratitude to all the participants. M.Boc. is supported by a grant from the Swiss National Science Foundation (PROSPER 3200BO-111362/1 and 3233BO-111361/1).

**Danish** (Inter99 and ADDITION Study Denmark): The Inter99 was initiated by Torben Jørgensen (PI), Knut Borch-Johnsen (co-PI), Hans Ibsen and Troels F. Thomsen. The steering committee comprises the former two and Charlotta Pisinger. The study was financially supported by research grants from the Danish Research Council, The Danish Centre for Health Technology Assessment, Novo Nordisk Inc., Research Foundation of Copenhagen County, the Ministry of Internal Affairs and Health, The Danish Heart Foundation, The Danish Pharmaceutical Association, The Augustinus Foundation, The Ib Henriksen Foundation, the Becket Foundation, the Lundbeck Foundation Centre of Applied Medical Genomics for Personalized Disease Prediction, Prevention and Care (LUCAMP), and the

Danish Diabetes Association. The ADDITION study Denmark was initiated by Knut Borch-Johnsen (PI), Torsten Lauritzen (PI) and Anneli Sandbæk. The study was supported by the National Health Services in the counties of Copenhagen, Aarhus, Ringkøbing, Ribe and South Jutland, together with the Danish Research Foundation for General Practice, Danish Centre for Evaluation and Health Technology Assessment, the diabetes fund of the National Board of Health, the Danish Medical Research Council, the Aarhus University Research Foundation and the Novo Nordisk Foundation. The study received unrestricted grants from Novo Nordisk, Novo Nordisk Scandinavia, Astra Denmark, Pfizer Denmark, GlaxoSmithKline Pharma Denmark, Servier Denmark and HemoCue Denmark.

**deCODE:** We thank the Icelandic study participants whose contribution made this work possible. We would also like to acknowledge the staff at the Clinical Research Centre (Iceland) and the deCODE Genetics biological materials and genotyping facilities for their work. The research performed at deCODE Genetics was part funded through the European Community's Seventh Framework Programme (FP7/2007-2013), ENGAGE project, grant agreement HEALTH-F4-2007- 201413.

**DGI and BotniaPPP:** We thank study participants, the Botnia and Skara research teams for clinical contributions, and colleagues at MGH, Broad, Novartis and Lund for data collection, genotyping and analysis. The initial GWAS genotyping was supported by Novartis (to DA). DA was a Burroughs Wellcome Fund Clinical Scholar in Translational Research, and is a Distinguished Clinical Scholar of the Doris Duke Charitable Foundation. L.G., T.Tu., V.L., B.I. and the Botnia Study are principally supported by The Folkhalsan Research Foundation, Sigrid Juselius Foundation, Finnish Cultural Foundation, The Ministry of Education in Finland, the Finnish Diabetes Research Foundation, Ollqvist Foundation and Clinical Research

Institute HUCH Ltd; work in Malmö, Sweden was also funded by grants from the Swedish Research Council and the Wallenberg Foundation.

**DIAGEN:** We are grateful to all of the patients who cooperated in this study and to their referring physicians and diabetologists in Saxony. This study was supported by the Dresden University of Technology funding grant, Med Drive.

**ENGAGE:** The work of the ENGAGE (European Network for Genetic and Genomic Epidemiology) Consortium is funded through the European Community's Seventh Framework Programme (HEALTH-F4-2007- 201413). Replication genotyping was supported in part by Diabetes UK grant RD08/0003704. Personal funding comes from the Throne-Holst Foundation (C.M.L.). C.M.L. is a Wellcome Trust Research Career Development Fellow.

**EUROSPAN** (European Special Populations Research Network) was supported by European Commission FP6 STRP grant number 018947 (LSHG-CT-2006-01947). High-throughput genome-wide association analysis of the data was supported by joint grant from Netherlands Organisation for Scientific Research and the Russian Foundation for Basic Research (NWO-RFBR 047.017.043).

The **ERF** study was supported by grants from the NWO, Erasmus MC and the Centre for Medical Systems Biology (CMSB). We are grateful to all patients and their relatives, general practitioners and neurologists for their contributions and to P. Veraart for her help in genealogy, Jeannette Vergeer for the supervision of the laboratory work and P. Snijders for his help in data collection.

The **Family Heart Study** (FamHS) work was supported in part by NIH grants 5R01 HL08770003, 5R01 HL08821502 (Michael A. Province) from NHLBI, and 5R01 DK07568102, 5R01 DK06833603 from NIDDK (Ingrid B. Borecki).

**Fenland:** The Fenland Study is funded by the Wellcome Trust and the Medical Research Council. We are grateful to all the volunteers for their time and help, and to the General Practitioners and practice staff for help with recruitment. We thank the Fenland Study co-ordination team and the Field Epidemiology team of the MRC Epidemiology Unit for recruitment and clinical testing. We also thank the NIHR Cambridge Biomedical Research Centre, Cambridge, U.K. for biochemical analyses.

**Framingham Heart Study:** This research was conducted in part using data and resources from the Framingham Heart Study of the National Heart Lung and Blood Institute of the National Institutes of Health and Boston University School of Medicine. The analyses reflect intellectual input and resource development from the Framingham Heart Study investigators participating in the SNP Health Association Resource (SHARe) project. This work was partially supported by the National Heart, Lung and Blood Institute's Framingham Heart Study (Contract No. N01-HC-25195) and its contract with Affymetrix, Inc for genotyping services (Contract No. N02-HL-6-4278). A portion of this research utilized the Linux Cluster for Genetic Analysis (LinGA-II) funded by the Robert Dawson Evans Endowment of the Department of Medicine at Boston University School of Medicine and Boston Medical Center. Also supported by National Institute for Diabetes and Digestive and Kidney Diseases (NIDDK) R01 DK078616 to Drs. Meigs, Dupuis and Florez, NIDDK K24 DK080140 to Dr. Meigs, and NIDDK Research Career Award K23 DK65978, a Massachusetts General Hospital Physician Scientist Development Award and a Doris Duke Charitable Foundation Clinical Scientist Development Award to Dr. Florez.

**French** genetic studies were supported in part by the "Conseil Regional Nord-Pas-de-Calais: Fonds européen de développement économique et regional", French Government ("Agence

*Nationale de la Recherche*”), Genome Quebec-Genome Canada, the British Medical Research Council and the charities: “*Association Française des Diabétiques*”, “*Programme National de Recherche sur le Diabète*” and “*Association de Langue Française pour l’Etude du Diabète et des Maladies Métaboliques*”. NBN’s position is supported by a grant from the ANR (Agence Nationale pour la Recherche: ANR-06 PHYSIO - 037 -02). We acknowledge funding to PF by the European Union (Integrated Project EURODIA LSHM-CT-2006-518153 in the Framework Programme 6 [FP06] of the European-Community). We thank B Heude for providing DNA sample of the lean children from the Fleurbaix-Laventie study, M Deweinder and F Allegaert for DNA extraction of part of the cohorts studied, S Gaget and S Gallina and F De Graeve for bioinformatics support. We acknowledge the “Centre de Médecine Préventive (CMP) de Vandoeuvre-Les-Nancy” where the STANISLAS cohort was recruited. The D.E.S.I.R. study has been supported by INSERM (“*Réseaux en Santé Publique, Interactions entre les déterminants de la santé*”), CNAMTS, Lilly, Novartis Pharma and Sanofi-Aventis, the Association Diabète Risque Vasculaire, the Fédération Française de Cardiologie, La Fondation de France, ALFEDIAM, ONIVINS, Ardix Medical, Bayer Diagnostics, Becton Dickinson, Cardionics, Merck Santé, Novo Nordisk, Pierre Fabre, Roche, Topcon. .

The D.E.S.I.R. Study Group: INSERM U780: B. Balkau, P. Ducimetière, E. Eschwège; INSERM U367: F. Alhenc-Gelas; CHU D’Angers: Y. Gallois, A. Girault; Bichat Hospital: F. Fumeron, M. Marre; Medical Examination Services: Alençon, Angers, Caen, Chateauroux, Cholet, Le Mans, and Tours; Research Institute for General Medicine: J. Cogneau; General practitioners of the region; Cross-Regional Institute for Health: C. Born, E. Caces, M. Cailleau, J. G. Moreau, F. Rakotozafy, J. Tichet, S. Vol. The STANISLAS cohort has been supported by the CNAM (Caisse Nationale d’Assurance Maladie), the INSERM (Institut National de la Santé et de la Recherche Médicale), the Nancy University Henri Poincaré, the ‘Region Lorraine’, and the

CUGN (Communauté Urbaine du Grand Nancy). We are sincerely indebted to all subjects who participated in this study.

**FUSION:** We would like to thank the many Finnish volunteers who generously participated in the FUSION, D2D, Health 2000, Finrisk 1987, Finrisk 2002, and Savitaipale studies from which we chose our FUSION GWA and replication cohorts (no overlap with Health 2000 replication cohort). We also thank Terry Gliedt and Peggy White for informatics and analysis support. The Center for Inherited Disease Research performed the GWA genotyping. Support for this study was provided by the following: American Diabetes Association grant 1-05-RA-140 (R.M.W.) and NIH grants DK069922 (R.M.W.), U54 DA021519 (R.M.W.), DK062370 (M.Boe.), and DK072193 (K.L.M.). Additional support comes from the National Human Genome Research Institute intramural project number 1 Z01 HG000024 (F.S.C.).

**GEM Consortium:** We thank all study participants. The work on the Cambridgeshire case-control, Ely, ADDITION and EPIC-Norfolk studies was funded by support from the Wellcome Trust and MRC. The Norfolk Diabetes study is funded by the MRC with support from NHS Research & Development and the Wellcome Trust and we are grateful to the study team. We thank the technical teams, in particular Emma Gray, Jackie Bryant and Sarah Edkins, at the Wellcome Trust Sanger Institute and the MRC Epidemiology laboratory for genotyping and informatics support. IB acknowledges support from the Wellcome Trust 077016/Z/05/Z. I.B. acknowledges support from WT grant 077016/Z/05/Z and EU FP6 funding (contract no.LSHM-CT-2003-503041).GENDAI and GHRAS would like to thank all the field investigators for samples and data collection and all the children, their parents and the elderly people for participation in the study. The GENDAI cohort was supported by a research grant from Coca Cola Hellas.

**GenomeEUtwin:** We acknowledge support from NWO/ZonMW: 904-61-090, 480-04-004; 400-05-717), Center for Medical Systems Biology (NWO Genomics); SPI 56-464-14192); Geestkracht program (10-000-1002); matching funds from universities and mental health care institutes involved in NESDA (GGZ Buitenamstel-Geestgronden, Rivierduinen, University Medical Center Groningen, GGZ Lentis, GGZ Friesland, GGZ Drenthe); Centre for Neurogenomics and Cognitive Research (CNCR-VU); Genomewide analyses of European twin and population cohorts (EU/QLRT-2001-01254); the Genetic Association Information Network (GAIN) of the Foundation for the US National Institutes of Health. J.Ka. has been supported by the Academy of Finland Centre of Excellence in Complex Disease Genetics.

**Health 2000:** We thank the volunteers who participated in the HEALTH 2000 study. We are grateful for the excellent laboratory work of Anne Vikman and Eija Hämäläinen. VS was supported by the Finnish Academy, grant number 129494 and the Finnish Foundation for Cardiovascular Research. LP and KS have been supported by the Academy of Finland Centre of Excellence in Complex Disease Genetics, the Biocentrum Helsinki Foundation, Helsinki, Finland and the Finnish Foundation for Cardiovascular Research. MP was supported by the Finnish Foundation for Cardiovascular disease, the Sigrid Jusélius Foundation, and the Finnish Academy SALVE-program "Pubgensense", grant number 129322.

**The Hertfordshire Cohort Study** was funded by the Medical Research Council and Arthritis Research Campaign. Genotyping is supported by an MRC-GSK grant to the MRC Epidemiology Unit, Cambridge, UK.

**InCHIANTI:** We thank the Intramural Research Program of the NIH, National Institute on Aging who are responsible for the InCHIANTI samples. We also thank the InCHIANTI participants. The InCHIANTI study baseline (1998-2000) was supported as a "targeted



project" (ICS110.1/RF97.71) by the Italian Ministry of Health and in part by the U.S. National Institute on Aging (Contracts: 263 MD 9164 and 263 MD 821336); the InCHIANTI Follow-up 1 (2001-2003) was funded by the U.S. National Institute on Aging (Contracts: N.1-AG-1-1 and N.1-AG-1-2111); the InCHIANTI Follow-ups 2 and 3 studies (2004-2010) were financed by the U.S. National Institute on Aging (Contract: N01-AG-5-0002); supported in part by the Intramural research program of the National Institute on Aging, National Institutes of Health, Baltimore, Maryland.

**KORA:** Studies were financed by the Helmholtz Zentrum München- Research Center for Environment and Health, Neuherberg, Germany and supported by grants from the German Federal Ministry of Education and Research (BMBF), the German National Genome Research Network (NGFN) and the Munich Center of Health Sciences (MC Health) as part of LMUinnovativ. Additional funds were provided by the German Diabetes Center (Düsseldorf, Germany), the Federal Ministry of Health (Berlin, Germany) and the Ministry of Innovation, Science, Research and Technology of the state North Rhine-Westphalia (Düsseldorf, Germany). WR was supported by a research grant of the Deutsche Forschungsgemeinschaft (DFG, RA 459/2-1). We thank all members of field staffs who were involved in the planning and conduct of the MONICA/KORA Augsburg studies.

**MesyBePo:** JS was supported by a research group of the German Ministry of Education and Research (BMBF Molecular Nutrition) and a Heisenberg-Professorship of the Deutsche Forschungsgemeinschaft (DFG; SP716/2-1).

**METSIM:** Support was provided by grant 124243 from the Academy of Finland.

**MICROS:** The MICROS study is part of the genomic health care program 'GenNova' and was carried out in three villages of the Val Venosta on the populations of Stelvio, Vallelunga and

Martello. We thank the primary care practitioners Raffaella Stocker, Stefan Waldner, Toni Pizzocco, Josef Plangger, Ugo Marcadent and the personnel of the Hospital of Silandro (Department of Laboratory Medicine) for their participation and collaboration in the research project. In South Tyrol, the study was supported by the Ministry of Health and Department of Educational Assistance, University and Research of the Autonomous Province of Bolzano and the South Tyrolean Sparkasse Foundation.

**NFBC 1966:** We thank Professor Paula Rantakallio (launch of NFBC 1966 and initial data collection), Ms Tuula Ylitalo (administration), Mr Markku Koironen (data management), Ms Outi Tornwall and Ms Minttu Jussila (DNA biobanking). Financial support was received from the Academy of Finland (project grants 104781, 120315 and Center of Excellence in Complex Disease Genetics), University Hospital Oulu, Biocenter, University of Oulu, Finland, NHLBI grant 5R01HL087679-02 through the STAMPEED program (1RL1MH083268-01), ENGAGE project and grant agreement HEALTH-F4-2007-201413, the Medical Research Council (studentship grant G0500539, centre grant G0600705), the Wellcome Trust (project grant GR069224), UK, and the Research Council UK fellowship. The DNA extractions, sample quality controls, biobank up-keeping and aliquotting was performed in the National Public Health Institute, Biomedicum Helsinki, Finland and supported financially by the Academy of Finland and Biocentrum Helsinki.

**NHANES:** The data are from the NHANES III Genetic Data Sets. We thank Dr. Sekar Kathiresan at the Massachusetts General Hospital and Broad Institute for his collaboration in assembling the NHANES III samples. The findings and conclusions in this paper are those of the author(s) and do not necessarily represent the views of the Research Data Center, National Center for Health Statistics, Centers for Disease Control and Prevention.

**The Northern Swedish Population Health Study** was supported by grants from The Swedish Natural Sciences Research Council, The European Commission through EUROSPAN, The Foundation for Strategic Research (SSF) and The Linneaus Centre for Bioinformatics (LCB). We are also grateful for the contribution of samples from the Medical Biobank in Umeå and for the contribution of the district nurse Svea Hennix in the Karesuando study.

**NTR and NESDA** would like to acknowledge support from NWO including (a) genetic basis of anxiety and depression (904-61-090); (b) resolving cause and effect in the association between exercise and well-being (904-61-193); (c) twinfamily database for behavior genomics studies (480-04-004); (d) twin research focusing on behavior (400-05-717) and (e) Center for Medical Systems Biology (NWOGenomics). Additional support comes from Spinozapremie (SPI 56-464-14192); the Centre for Neurogenomics and Cognitive Research (CNCR-VU); the European Union (QLRT-2001-01254); NIMH (R01 MH059160); and the Geestkracht program of ZonMW (10-000-1002) as well as matching funds from universities and mental health care institutes involved in NESDA (GGZ Buitenamstel-Geestgronden, Rivierduinen, University Medical Center Groningen, GGZ Lentis, GGZ Friesland, GGZ Drenthe). Major funding for the GWA genotyping was provided through the Foundation for the US National Institutes of Health via the Genetic Association Information Network (GAIN) initiative. We would like to acknowledge the contribution of Patrick Sullivan (Principal Investigator of the GAIN\_MDD project).

**Nurses Health Study-Health Professionals Follow-up Study-GENEVA** are supported by NIH grants U01HG004399, DK58845, and CA87969.

**ORCADES** was supported by the Chief Scientist Office of the Scottish Government and the Royal Society. DNA extractions were performed at the Wellcome Trust Clinical Research

Facility in Edinburgh. We would like to acknowledge the invaluable contributions of Lorraine Anderson and the research nurses in Orkney, the administrative team in Edinburgh and the people of Orkney.

**Partners/Roche:** We thank Roche Pharmaceuticals for its support and collaboration in assembling the Partners/Roche cohort. Supported by the Mallinckrodt General Clinical Research Program, National Center for Research Resources, NIH RR01066.

**PIVUS and ULSAM:** Genotyping was performed by the SNP Technology Platform in Uppsala ([www.genotyping.se](http://www.genotyping.se)). We thank Tomas Axelsson, Ann-Christine Wiman and Caisa Pöntinen for their excellent assistance with genotyping. The SNP Technology Platform is supported by Uppsala University and the Knut and Alice Wallenberg Foundation. E.I. is supported by grants from the Swedish Research Council and the Swedish Heart-Lung Foundation. B.Z. is supported by grants from the family foundations of Thureus, Ernfors, Thuring, Sehlander, and Ake Wiberg, by the Swedish Diabetes Association Research Fund and Uppsala University.

**PROCARDIS:** We are grateful to the participants and to the medical and nursing staff who assisted in this project. This work was funded EC Sixth Framework Programme (LSHM-CT-2007- 037273) and AstraZeneca AB. RCI and RC acknowledge support from the MRC; AH obtained support for this project from the Swedish Heart-Lung Foundation, the Swedish Medical Research Council (8691), the Knut and Alice Wallenberg Foundation, the Karolinska Institute and the Stockholm County Council (560183). We are indebted for the technical contributions of Ivo Gut and Diana Zelenika.

**Rotterdam:** The generation and management of GWAS genotype data for the Rotterdam Study is supported by the Netherlands Organization of Scientific Research NWO Investments

(nr. 175.010.2005.011, 911-03-012), the Research Institute for Diseases in the Elderly (014-93-015; RIDE2),EUROSPAN (European Special Populations Research Network;LSHG-CT-2006-01947),the Netherlands Organization for Scientific Research (Pionier, 047.016.009, 047.017.043;050-060-810), Erasmus MC and the Centre for Medical Systems Biology (CMSB I and II and Grand; National Genomics Initiative) of the Netherlands Genomics Initiative (NGI); The Rotterdam Study is further funded by Erasmus Medical Center and Erasmus University, Rotterdam, Netherlands Organization for the Health Research and Development (ZonMw), the Research Institute for Diseases in the Elderly (RIDE), the Ministry of Education, Culture and Science, the Ministry for Health, Welfare and Sports, the European Commission (DG XII), and the Municipality of Rotterdam. We thank Pascal Arp, Mila Jhamai, Dr Michael Moorhouse, Marijn Verkerk, and Sander Bervoets for their help in creating the GWAS database. The authors are grateful to the study participants, the staff from the Rotterdam Study and the participating general practitioners and pharmacists.

**SardiNIA** would like to thank the Sardinian volunteers who generously supported the study and made it possible as well as the administration of Lanusei, Ilbono, Arzana and Elini (Sardinia, Italy). We also acknowledge G. Usala, M. Dei, S. Lai, A. Maschio, F. Busonero, A. Mulas, for data collection and genotyping. The SardiNIA team was supported by Contract NO1-AG-1-2109 from the National Institute on Aging and in part by intramural research funds from the National Institute on Aging and by research grants from the National Institutes of Health (NHLBI, NHGRI to GRA) including HG-02651 and HL-084729.

**Segovia:** Supported by grant FISS 03/1618 from Fondo de Investigaciones Sanitarias and a grant from Instituto de Salud Carlos III - RETIC RD06 (RD06/0015/0012). This work was also partially supported by an Educational Grant from Eli Lilly Laboratories, Spain. CIBER de

Diabetes y Enfermedades Metabólicas Asociadas is an ISCIII project, Spain. We thank Milagros Pérez-Barba and Carmen Obiang-Ansue for dedicated and careful technical assistance, and Dr. Cristina Fernández, Dr. Arturo Corbatón and CEGEN (Centro Nacional de Genotipado) for their assistance with genotyping.

**Sorbs:** Dr Knut Krohn, Microarray Core Facility of the Interdisciplinary Centre for Clinical Research, University of Leipzig, Germany; German Research Council KFO-152 (to Michael Stumvoll); IZKF B27 (to Michael Stumvoll, Peter Kovacs and Anke Tönjes).

**SUVIMAX:** Commissariat à l'Énergie Atomique, Conservatoire National des Arts et Métiers, Institut National de la Recherche Agronomique, Institut National de la Santé et de la Recherche Médicale.

**TwinsUK:** The authors acknowledge financial support from the Wellcome Trust, the Department of Health via the National Institute for Health Research (NIHR) comprehensive Biomedical Research Centre award to Guy's & St Thomas' NHS Foundation Trust in partnership with King's College London/ Arthritis Research Campaign/ EC FP6 Programme Grant-512066 (LSHG-CT-2004)MOLPAGE / EC Framework 7 programme grant 200800 Treat OA / EC Framework 7 Health-2007-A ENGAGE / EC Framework 7 Health-2007-2.4.5-4 GEFOS / EC FP6 MRTN-CT-2006-034021 MyEuropa Research Training Network / Chronic Disease Research Foundation (CDRF)/National Health and Medical Research Council (NHMRC) / National Institute of Aging (NIA) / Guide Dogs for the blind Association(GDBA) / Biotechnology and biological Sciences Research Council (BBSRC). NS is funded by the Wellcome Trust and FP-6 (LSHM-CT-2006-037197). We thank the study participants and staff from the TwinsUK studies, in particular Irina Gillham-Nasenya; staff of the DNA Collections and Genotyping Facilities at the Wellcome Trust Sanger Institute for sample

preparation, genotyping and quality control, including Mike Inouye, Simon Potter, Vasudev Kumanduri, Rhian Gwilliam, Pam Whittaker, and Radhi Ravindrarajah; Le Centre National de Génotypage, France, led by Mark Lathrop, for genotyping; Duke University, North Carolina, USA, led by David Goldstein, for genotyping; and the Finnish Institute of Molecular Medicine, Finnish Genome Center, University of Helsinki, led by Aarno Palotie.

**UKT2DGC:** The Wellcome Trust (Functional Genomics Grant No: 072960) provides core support for Wellcome Trust United Kingdom Type 2 Diabetes Case Control Collection, based in Tayside Scotland. We are grateful to all participants who took part in this study, the general practitioners and Scottish School of Primary Care for their help in recruiting them, and the whole team, which includes interviewers, computer and laboratory technicians, clerical workers, research scientists, volunteers, managers, receptionists and nurses. Ethical approval for the study was obtained from the Tissue Bank Committee and Tayside Committee on Medical Research Ethics.

**UK T2D cohorts:** Collection of the UK type 2 diabetes cases was supported by Diabetes UK, BDA Research and the UK Medical Research Council (Biomedical Collections Strategic Grant G0000649). We acknowledge use of genotype data collected by the British 1958 Birth Cohort DNA collection, funded by the Medical Research Council grant G0000934 and the Wellcome Trust grant 068545/Z/02 and of samples from the UK Blood Services Collection. GWA genotyping was supported by the Wellcome Trust (076113) and we recognize the contribution of those in the Wellcome Trust Case Control Consortium responsible for the genotyping and analysis. Replication genotyping was supported by the European Commission (EURODIA LSHG-CT-2004- 518153), MRC (Project Grant G016121), Wellcome Trust, Peninsula Medical School, and Diabetes UK. Andrew P. Morris is a Wellcome Trust

Senior Fellow, Michael N. Weedon a Vandervell Fellow and Mark I. McCarthy receives funding from the Oxford NIHR Biomedical Research Centre.

**Umeå:** Supported in part by grants from the Swedish Diabetes Association, Swedish Heart-Lung Foundation and Novo Nordisk to Paul W. Franks, and Västerbotten's health authority (to Olov Rolandsson and Göran Hallmans). Dr. Franks was funded in part with a strategic appointment by Västerbotten's health authority (2006-2009).

**The VIS study** in the Croatian island of Vis was supported through the grants from the Medical Research Council UK to H.C., A.F.W. and I.R.; and Ministry of Science, Education and Sport of the Republic of Croatia to I.R. (number 108-1080315-0302). The authors collectively thank a large number of individuals for their individual help in organizing, planning and carrying out the field work related to the project and data management: Professor Pavao Rudan and the staff of the Institute for Anthropological Research in Zagreb, Croatia (organization of the field work, anthropometric and physiological measurements, and DNA extraction); Professor Ariana Vorko-Jovic and the staff and medical students of the Andrija Stampar School of Public Health of the Faculty of Medicine, University of Zagreb, Croatia (questionnaires, genealogical reconstruction and data entry); Dr Branka Salzer from the biochemistry lab "Salzer", Croatia (measurements of biochemical traits); local general practitioners and nurses (recruitment and communication with the study population); and the employees of several other Croatian institutions who participated in the field work, including but not limited to the University of Rijeka and Split, Croatia; Croatian Institute of Public Health; Institutes of Public Health in Split and Dubrovnik, Croatia. SNP Genotyping of the Vis samples was carried out by the Genetics Core Laboratory at the Wellcome Trust Clinical Research Facility, WGH, Edinburgh.



**WASHS** is supported by Sir Charles Gairdner Hospital Research Foundation, and the Hollywood Private Hospital Research Foundation. The WASHS acknowledges the support of the Western Australian Genetic Epidemiology Resource and the Western Australian DNA Bank (both National Health and Medical Research Council of Australia Enabling Facilities).

**Whitehall II:** The Whitehall II study has been supported by grants from the Medical Research Council; Economic and Social Research Council; British Heart Foundation; Health and Safety Executive; Department of Health; National Heart Lung and Blood Institute (HL36310), US, NIH: National Institute on Aging (AG13196), US, NIH; Agency for Health Care Policy Research (HS06516); and the John D and Catherine T MacArthur Foundation Research Networks on Successful Midlife Development and Socio-economic Status and Health. MM is supported by an MRC Research Professorship. Mika Kivimaki is supported by the Academy of Finland (grant 117604). Genotyping is supported by an MRC-GSK grant to the MRC Epidemiology Unit, Cambridge, UK.

**DISCLOSURES**

James B. Meigs currently has research grants from GlaxoSmithKline and sanofi-aventis, and serves on consultancy boards for Eli Lilly and Interleukin Genetics. Jose C. Florez has received consulting honoraria from Merck, Pfizer, bioStrategies, XOMA and Publicis Healthcare Communications Group, a global advertising agency engaged by Amylin Pharmaceuticals. deCODE authors are employees at deCODE genetics, and own stock or stock options in the company. Paul W. Franks has received consulting honoraria from Unilever. Peter Vollenweider and Gérard Waeber received financial support from GlaxoSmithKline to build the CoLaus study. Vincent Mooser, Kijoung Song and Dawn M. Waterworth are all full-time employees at GlaxoSmithKline. Inês Barroso and spouse own stock in GlaxoSmithKline and Incyte.

**Members of the DIAbetes Genetics Replication And Meta-analysis (DIAGRAM) Consortium are (alphabetically by cohort):**

**ARIC:** Man Li, David J Couper, W H Linda Kao, Eric Boerwinkle, James S Pankow

**CAMBRIDGE, UK:** Claudia Langenberg, Nicholas Smith, Michael J Sampson, Simon Griffin, Felicity Payne, Suzannah Bumpstead, Inês Barroso, Nicholas J Wareham

**DCDG:** Christian Dina, Stephane Cauchi, Guillaume Charpentier, Jean Tichet, Sammy Hadjadj, Ghislain Rocheleau, Beverley Balkau, Michel Marre, Christine Proença, Rob Sladek, Philippe Froguel

**DECODE:** Valgerdur Steinthorsdottir, Gudmar Thorleifsson, G Bragi Walters, Augustine Kong, Gunnar Sigurðsson, Rafn Benediktsson, Unnur Thorsteinsdottir, Kari Stefansson

**DIABETES GENETICS INITIATIVE:** Benjamin F Voight, Gabe Crawford, Todd Green, Soumya Raychaudhuri, Richa Saxena, Candace Guiducci, Noël P Burt, Valeriya Lyssenko, Kristin Ardlie, Kristina Bengtsson Boström, Tiinamaija Tuomi, Bo Isomaa, Peter Nilsson, Shaun Purcell, Ayellet V Segrè, Steve A McCarroll, Amanda L Elliott, Mark J Daly, Leif Groop, David Altshuler

**DUNDEE:** Colin NA Palmer, Alex SF Doney, Andrew D Morris

**EUROSPAN:** Yurii S Aulchenko, Christopher S Franklin, Cornelia M van Duijn, Ulf Gyllensten, Peter P Pramstaller, Igor Rudan, Harry Campbell, James F Wilson

**FRAMINGHAM:** Jose C Florez, Peter Shrader, Josée Dupuis, Caroline S Fox, James B Meigs

**FUSION:** Laura J Scott, Ryan P Welch, Heather M Stringham, Anne U Jackson, Martha Ganser, Richard M Watanabe, Lori L Bonycastle, Peter S Chines, Michael R Erdos, Narisu Narisu, Amy J Swift, Mario A Morcken, Cristen J Willer, Goncalo R Abecasis, Richard N Bergman, Jaakko Tuomilehto, Karen L Mohlke, Francis S Collins, Michael Boehnke

**HAGEDORN, DENMARK:** Thomas Sparsø, Niels Grarup, Torben Jørgensen, Torsten Lauritzen, Anelli Sandbaek, Knut Borch-Johnsen, Torben Hansen, Oluf Pedersen

**HUNT:** Kristian Midthjell, Kristian Hveem

**KORA:** Harald Grallert, Christian Gieger, Cornelia Huth, Ann-Kristin Petersen, Norman Klopp, Wolfgang Rathmann, Christian Herder, Klaus Strassburger, Michael Roden, Christa Meisinger, Barbara Thorand, H-Erich Wichmann, Thomas Illig

**METSIM:** Johanna Kuusisto, Markku Laakso

**NURSES' HEALTH STUDY:** Lu Qi, Marilyn Cornelis, Rob van Dam, Qi Sun, David Hunter, Peter Kraft, Frank B Hu

**ROTTERDAM:** Yurii Aulchenko, Mandy van Hoek, Jacqueline Witteman, Najaf Amin, Alouisius Lieveise, Thijs van Herpt, Bert Bravenboer, Andre Uitterlinden, Eric Sijbrands, Albert Hofman, Cornelia van Duijn

**UK T2D GENETICS CONSORTIUM:** N William Rayner, Christopher J Groves, Beverley M Shields, Michael N Weedon, Amanda J Bennett, Cecilia M Lindgren, Katharine R Owen, Neil R Robertson, Eleftheria Zeggini, Neelam Hassanali, Katherine S Elliott, Graham A Hitman, Mark Walker, Inga Prokopenko, Andrew P Morris, Timothy M Frayling, Andrew T Hattersley, Mark I McCarthy

**ULM:** Roza Blagieva, Bernhard O Boehm

**Project management:** Benjamin F Voight, Yurii Aulchenko, Christian Dina, Andrew P Morris, Laura J Scott, Valgerdur Steinthorsdottir, Eleftheria Zeggini, James F Wilson, David Altshuler, Michael Boehnke, Cornelia van Duijn, Timothy M Frayling, Philippe Froguel, Leif Groop, Andrew T Hattersley, Thomas Illig, Eric Sijbrands, Rob Sladek, Kari Stefansson, Unnur Thorsteinsdottir, Mark I McCarthy

**GIANT CONSORTIUM MEMBERSHIP AND AFFILIATIONS**

Cristen J Willer<sup>1,77,78</sup>, Elizabeth K Speliotes<sup>2,3,77,78</sup>, Ruth J F Loos<sup>4,5,77,78</sup>, Shengxu Li<sup>4,5,77,78</sup>, Cecilia M Lindgren<sup>6,21,78</sup>, Iris M Heid<sup>7,78</sup>, Sonja I Berndt<sup>8</sup>, Amanda L Elliott<sup>9,10</sup>, Anne U Jackson<sup>1</sup>, Claudia Lamina<sup>7</sup>, Guillaume Lettre<sup>9,11</sup>, Noha Lim<sup>12</sup>, Helen N Lyon<sup>3,11</sup>, Steven A McCarroll<sup>9,10</sup>, Konstantinos Papadakis<sup>13</sup>, Lu Qi<sup>14,15</sup>, Joshua C Randall<sup>6</sup>, Rosa Maria Roccascella<sup>16</sup>, Serena Sanna<sup>17</sup>, Paul Scheet<sup>18</sup>, Michael N Weedon<sup>19</sup>, Eleanor Wheeler<sup>16</sup>, Jing Hua Zhao<sup>4,5</sup>, Leonie C Jacobs<sup>20</sup>, Inga Prokopenko<sup>6,21</sup>, Nicole Soranzo<sup>16,22</sup>, Toshiko Tanaka<sup>23</sup>, Nicholas J Timpson<sup>24</sup>, Peter Almgren<sup>25</sup>, Amanda Bennett<sup>26</sup>, Richard N Bergman<sup>27</sup>, Sheila A Bingham<sup>28,29</sup>, Lori L Bonnycastle<sup>30</sup>, Morris Brown<sup>31</sup>, Noël P Burt<sup>9</sup>, Peter Chines<sup>30</sup>, Lachlan Coin<sup>32</sup>, Francis S Collins<sup>30</sup>, John M Connell<sup>33</sup>, Cyrus Cooper<sup>34</sup>, George Davey Smith<sup>24</sup>, Elaine M Dennison<sup>34</sup>, Parimal Deodhar<sup>30</sup>, Paul Elliott<sup>32</sup>, Michael R Erdos<sup>30</sup>, Karol Estrada<sup>20</sup>, David M Evans<sup>24</sup>, Lauren Gianniny<sup>9</sup>, Christian Gieger<sup>7</sup>, Christopher J Gillson<sup>4,5</sup>, Candace Guiducci<sup>9</sup>, Rachel Hackett<sup>9</sup>, David Hadley<sup>13</sup>, Alistair S Hall<sup>35</sup>, Aki S Havulinna<sup>36</sup>, Johannes Hebebrand<sup>37</sup>, Albert Hofman<sup>38</sup>, Bo Isomaa<sup>39</sup>, Kevin B Jacobs<sup>40</sup>, Toby Johnson<sup>41-43</sup>, Pekka Jousilahti<sup>36</sup>, Zorica Jovanovic<sup>5,44</sup>, Kay-Tee Khaw<sup>45</sup>, Peter Kraft<sup>46</sup>, Mikko Kuokkanen<sup>9,47</sup>, Johanna Kuusisto<sup>48</sup>, Jaana Laitinen<sup>49</sup>, Edward G Lakatta<sup>50</sup>, Jian'an Luan<sup>4,5</sup>, Robert N Luben<sup>45</sup>, Massimo Mangino<sup>69</sup>, Wendy L McArdle<sup>52</sup>, Thomas Meitinger<sup>53,54</sup>, Antonella Mulas<sup>17</sup>, Patricia B Munroe<sup>55</sup>, Narisu Narisu<sup>30</sup>, Andrew R Ness<sup>56</sup>, Kate Northstone<sup>52</sup>, Stephen O'Rahilly<sup>5,44</sup>, Carolin Purmann<sup>5,44</sup>, Matthew G Rees<sup>30</sup>, Martin Ridderstråle<sup>57</sup>, Susan M Ring<sup>52</sup>, Fernando Rivadeneira<sup>20,38</sup>, Aimo Ruukonen<sup>58</sup>, Manjinder S Sandhu<sup>4,45</sup>, Jouko Saramies<sup>59</sup>, Laura J Scott<sup>1</sup>, Angelo Scuteri<sup>60</sup>, Kaisa Silander<sup>47,71</sup>, Matthew A Sims<sup>4,5</sup>, Kijoung Song<sup>12</sup>, Jonathan Stephens<sup>61</sup>, Suzanne Stevens<sup>51</sup>, Heather M Stringham<sup>1</sup>, Y C Loraine Tung<sup>5,44</sup>, Timo T Valle<sup>62</sup>, Cornelia M Van Duijn<sup>38</sup>, Karani S Vimalaswaran<sup>4,5</sup>, Peter Vollenweider<sup>63</sup>, Gerard Waeber<sup>63</sup>, Chris Wallace<sup>55</sup>, Richard M Watanabe<sup>64</sup>, Dawn M Waterworth<sup>12</sup>, Nicholas Watkins<sup>61</sup>, The Wellcome Trust Case Control Consortium<sup>76</sup>, Jacqueline C M Witteman<sup>38</sup>, Eleftheria Zeggini<sup>6</sup>, Guangju Zhai<sup>22</sup>, M Carola Zillikens<sup>20</sup>, David Altshuler<sup>9,10</sup>, Mark J Caulfield<sup>55</sup>, Stephen J Chanock<sup>8</sup>, I Sadaf Farooqi<sup>5,44</sup>, Luigi Ferrucci<sup>23</sup>, Jack M Guralnik<sup>65</sup>, Andrew T Hattersley<sup>66</sup>, Frank B Hu<sup>14,15</sup>, Marjo-Riitta Jarvelin<sup>32</sup>, Markku Laakso<sup>48</sup>, Vincent Mooser<sup>12</sup>, Ken K Ong<sup>4,5</sup>, Willem H Ouwehand<sup>16,61</sup>, Veikko Salomaa<sup>36</sup>, Nilesh J Samani<sup>51</sup>, Timothy D Spector<sup>22</sup>, Tiinamaija Tuomi<sup>67,68</sup>, Jaakko Tuomilehto<sup>67</sup>, Manuela Uda<sup>17</sup>, André G Uitterlinden<sup>20,38</sup>, Nicholas J Wareham<sup>4,5</sup>, Panagiotis Deloukas<sup>16</sup>, Timothy M Frayling<sup>19</sup>, Leif C Groop<sup>25</sup>, Richard B Hayes<sup>8</sup>, David J Hunter<sup>9,14,15,46</sup>, Karen L Mohlke<sup>70</sup>, Leena Peltonen<sup>9,16,71</sup>, David Schlessinger<sup>72</sup>, David P Strachan<sup>13</sup>, H-Erich Wichmann<sup>7,73</sup>, Mark I McCarthy<sup>6,21,74,78,79</sup>, Michael Boehnke<sup>1,78,79</sup>, Inês Barroso<sup>16,78,79</sup>, Gonçalo R Abecasis<sup>18,78,79</sup> & Joel N Hirschhorn<sup>3,11,75,78,79</sup> for the GIANT Consortium<sup>80</sup>

1. Center for Statistical Genetics, Department of Biostatistics, University of Michigan School of Public Health, Ann Arbor, Michigan 48109, USA.

2. Division of Gastroenterology, Massachusetts General Hospital, Boston, Massachusetts 02114, USA.

3. Metabolism Initiative and Program in Medical and Population Genetics, Broad Institute of Harvard and Massachusetts Institute of Technology, Boston, Massachusetts 02142, USA.

4. Medical Research Council Epidemiology Unit, Addenbrooke's Hospital, Cambridge CB2 0QQ, UK.

5. Institute of Metabolic Science, Addenbrooke's Hospital, Cambridge CB2 0QQ, UK.

6. Wellcome Trust Centre for Human Genetics, University of Oxford, Oxford OX3 7BN, UK.

7. Institute of Epidemiology, Helmholtz Zentrum München, Ingolstaedter Landstrasse 1, 85764 Neuherberg, Germany.
8. Division of Cancer Epidemiology and Genetics, National Cancer Institute, National Institutes of Health, Department of Health and Human Services, Bethesda, Maryland 20892, USA.
9. Program in Medical and Population Genetics, BroadInstitute of MIT and Harvard, Cambridge, Massachusetts 02142, USA.
10. Center for Human Genetic Research, Massachusetts General Hospital, Boston, Massachusetts 02114, USA.
11. Program in Genomics and Divisions of Endocrinology and Genetics, Children's Hospital, Boston, Massachusetts 02115, USA.
12. Medical Genetics/Clinical Pharmacology and Discovery Medicine, Glaxo SmithKline, King of Prussia, Pennsylvania 19406, USA.
13. Division of Community Health Sciences, St. George's, University of London, London SW17 0RE, UK.
14. Department of Nutrition, Harvard School of Public Health, Boston, Massachusetts 02115, USA.
15. Channing Laboratory, Department of Medicine, Brigham and Women's Hospital, Boston, Massachusetts 02115, USA.
16. Wellcome Trust Sanger Institute, Hinxton, Cambridge CB10 1SA, UK.
17. Istituto di Neurogenetica e Neurofarmacologia, Consiglio Nazionale delle Ricerche, Cagliari 09042, Italy.
18. Department of Epidemiology, University of Texas, M.D. Anderson Cancer Center, Houston, Texas, 77030, USA.
19. Genetics of Complex Traits, Peninsula Medical School, Exeter EX1 2LU, UK.
20. Department of Internal Medicine, Erasmus MC, PO Box 2400, NL-3000-CA Rotterdam, Netherlands.
21. Oxford Centre for Diabetes, Endocrinology and Metabolism, University of Oxford, Churchill Hospital, Oxford OX3 7LJ, UK.
22. Department of Twin Research and Genetic Epidemiology, King's College London, London SE1 7EH, UK.
23. Clinical Research Branch, National Institute on Aging, Baltimore, Maryland 21250, USA.
24. MRC Centre for Causal Analyses in Translational Epidemiology, Department of Social Medicine, University of Bristol, Bristol BS8 2PR, UK.
25. Lund University Diabetes Centre, Department of Clinical Sciences, Lund University, 20502 Malmö, Sweden.
26. Oxford Centre for Diabetes, Endocrinology and Metabolism, University of Oxford, Oxford OX3 7LJ, UK.
27. Physiology and Biophysics, University of Southern California School of Medicine, Los Angeles, California 90033, USA.
28. MRC Dunn Human Nutrition Unit, Wellcome Trust/MRC Building, Cambridge CB2 0XY, UK.
29. MRC Centre for Nutritional Epidemiology in Cancer Prevention and Survival, Cambridge CB1 8RN, UK.
30. National Human Genome Research Institute, Bethesda, Maryland 20892, USA.
31. Clinical Pharmacology Unit, University of Cambridge, Addenbrooke's Hospital, Cambridge CB2 0QQ, UK.

32. Department of Epidemiology and Public Health, Imperial College London, St. Mary's Campus, Norfolk Place, London W21PG, UK.
33. British Heart Foundation Glasgow Cardiovascular Research Centre, Faculty of Medicine, University of Glasgow, Glasgow G12 8TA, UK.
34. MRC Epidemiology Resource Centre, University of Southampton, Southampton General Hospital, Southampton SO16 6YD, UK.
35. Yorkshire Heart Centre, Leeds General Infirmary, Leeds LS13EX, UK.
36. National Institute for Health and Welfare, Unit of Chronic Disease Epidemiology and Prevention, Helsinki, Finland.
37. Department of Child and Adolescent Psychiatry, University of Duisburg-Essen, Virchowstr. 174, 45147 Essen, Germany.
38. Department of Epidemiology, Erasmus MC, PO Box 2400, NL-3000-CA Rotterdam, The Netherlands.
39. Folkhalsan Research Center, Malmska Municipal Health Care Center and Hospital, FIN-00014 Jakobstad, Finland.
40. Bioinformed Consulting Services, Gaithersburg, Maryland 20877, USA.
41. Department of Medical Genetics, University of Lausanne, CH-1005 Lausanne, Switzerland.
42. University Institute for Social and Preventative Medicine, Centre Hospitalier Universitaire Vaudois (CHUV), CH-1005 Lausanne, Switzerland.
43. Swiss Institute of Bioinformatics, CH-1005 Lausanne, Switzerland.
44. University of Cambridge Metabolic Research Laboratories, Addenbrooke's Hospital, Cambridge CB2 0QQ, UK.
45. Department of Public Health and Primary Care, Institute of Public Health, University of Cambridge, Cambridge CB2 0SR, UK.
46. Program in Molecular and Genetic Epidemiology, Harvard School of Public Health, Boston, Massachusetts 02115, USA.
47. National Institute for Health and Welfare, Unit of Public Health Genomics, Helsinki, Finland.
48. Department of Medicine, University of Kuopio, 70210 Kuopio, Finland.
49. Finnish Institute of Occupational Health, Aapistie 1, Fin-90220 Oulu, Finland.
50. Laboratory of Cardiovascular Science, Gerontology Research Center, National Institute on Aging, Baltimore, Maryland 21224, USA.
51. Department of Cardiovascular Sciences, University of Leicester, Clinical Sciences, Glenfield General Hospital, Leicester LE3 9QP, UK.
52. Avon Longitudinal Study of Parents and Children (ALSPAC), Department of Social Medicine, University of Bristol, Bristol BS8 1TQ, UK.
53. Institute of Human Genetics, Helmholtz Zentrum München, Ingolstaedter Landstrasse 1, 85764 Neuherberg, Germany.
54. Institute of Human Genetics, Technical University Munich, D-81765, Munich, Germany.
55. Clinical Pharmacology, The William Harvey Research Institute, Bart's and The London, Queen Mary's School of Medicine and Dentistry, Charterhouse Square, London EC1M 6BQ, UK.
56. Department of Oral & Dental Science, University of Bristol, Bristol BS1 2LY, UK.
57. Department of Clinical Sciences, Lund University, 20502 Malmö, Sweden.
58. Department of Clinical Chemistry, University of Oulu, Fin-90220 Oulu, Finland.
59. Savitaipale Health Center, FIN-54800 Savitaipale, Finland.

60. 28 UO Geriatria - Istituto Nazionale Ricovero e Cura per Anziani (INRCA IRCCS) - Rome, Italy.
61. Department of Haematology, University of Cambridge/NHS Blood & Transplant, Cambridge CB2 2PR, UK.
62. National Institute for Health and Welfare, Unit of Diabetes Prevention, Helsinki, Finland.
63. Department of Internal Medicine, BH-10 Centre Hospitalier Universitaire Vaudois (CHUV), 1011 Lausanne, Switzerland.
64. Department of Preventive Medicine, Division of Biostatistics, Keck School of Medicine, University of Southern California, CHP-220, Los Angeles, California 90089, USA.
65. Laboratory of Epidemiology, Demography, and Biometry; Gerontology Research Center, National Institute on Aging, Bethesda, Maryland 20892, USA.
66. Peninsula Medical School, Exeter EX5 2DW, UK.
67. Department of Public Health, University of Helsinki, Helsinki, Finland.
68. Department of Medicine, Helsinki University Hospital, Helsinki, Finland and Folkhalsan Research Centre, Helsinki, Finland.
69. Twin Research & Genetic Epidemiology Department, King's College London, St Thomas' Hospital Campus, Lambeth Palace Rd, London SE1 7EH, UK.
70. Department of Genetics, University of North Carolina, CB #7264, Chapel Hill, North Carolina 27599, USA.
71. Institute for Molecular Medicine Finland FIMM, University of Helsinki, Helsinki, Finland.
72. Genome Technology Branch, National Human Genome Research Institute, Bethesda, Maryland 20892, USA.
73. Institute of Medical Information Processing, Biometry, and Epidemiology, Ludwig-Maximilians-University München, Marchioninistrasse 15, 81377 München, Germany.
74. National Institute for Health Research, Oxford Biomedical Research Centre, University of Oxford, Old Road, Headington, Oxford OX3 7LJ, UK.
75. Department of Genetics, Harvard Medical School, Boston, Massachusetts 02115, USA.
76. A full list of members is provided in the Supplementary Note of Willer *Nature Genetics* 40:161-169 (2008).
77. These authors contributed equally to this work.
78. Members of the writing team.
79. These authors jointly directed the project.
80. All authors are members of the Genetic Investigation of ANthropometric Traits (GIANT) Consortium.

**Global BPgen MEMBERSHIP and AFFILIATIONS:**

Christopher Newton-Cheh<sup>1,2,3</sup>, Toby Johnson<sup>4,5,6</sup>, Vesela Gateva<sup>7</sup>, Martin D Tobin<sup>8</sup>, Murielle Bochud<sup>5</sup>, Lachlan Coin<sup>9</sup>, Samer S Najjar<sup>10</sup>, Jing Hua Zhao<sup>11,12</sup>, Simon C Heath<sup>13</sup>, Susana Eyheramendy<sup>14,15</sup>, Konstantinos Papadakis<sup>16</sup>, Benjamin F Voight<sup>1,3</sup>, Laura J Scott<sup>7</sup>, Feng Zhang<sup>17</sup>, Martin Farrall<sup>18,19</sup>, Toshiko Tanaka<sup>20,21</sup>, Chris Wallace<sup>22,23</sup>, John C Chambers<sup>9</sup>, Kay-Tee Khaw<sup>12,24</sup>, Peter Nilsson<sup>25</sup>, Pim van der Harst<sup>26</sup>, Silvia Polidoro<sup>27</sup>, Diederick E Grobbee<sup>28</sup>, N Charlotte Onland-Moret<sup>28,29</sup>, Michiel L Bots<sup>28</sup>, Louise V Wain<sup>8</sup>, Katherine S Elliott<sup>19</sup>, Alexander Teumer<sup>30</sup>, Jian'an Luan<sup>11</sup>, Gavin Lucas<sup>31</sup>, Johanna Kuusisto<sup>32</sup>, Paul R Burton<sup>8</sup>, David Hadley<sup>16</sup>, Wendy L McArdle<sup>33</sup>, Wellcome Trust Case Control Consortium<sup>34</sup>, Morris Brown<sup>35</sup>, Anna Dominiczak<sup>36</sup>, Stephen J Newhouse<sup>22</sup>, Nilesh J Samani<sup>37</sup>, John Webster<sup>38</sup>, Eleftheria Zeggini<sup>19,39</sup>, Jacques S Beckmann<sup>4,40</sup>, Sven Bergmann<sup>4,5</sup>, Noha Lim<sup>41</sup>, Kijoung Song<sup>41</sup>, Peter Vollenweider<sup>42</sup>, Gerard Waeber<sup>42</sup>, Dawn M Waterworth<sup>41</sup>, Xin Yuan<sup>41</sup>, Leif Groop<sup>43,44</sup>, Marju Orho-Melander<sup>25</sup>, Alessandra Allione<sup>27</sup>, Alessandra Di Gregorio<sup>27,45</sup>, Simonetta Guarrera<sup>27</sup>, Salvatore Panico<sup>46</sup>, Fulvio Ricceri<sup>27</sup>, Valeria Romanazzi<sup>27,45</sup>, Carlotta Sacerdote<sup>47</sup>, Paolo Vineis<sup>9,27</sup>, Inês Barroso<sup>12,39</sup>, Manjinder S Sandhu<sup>11,12,24</sup>, Robert N Luben<sup>12,24</sup>, Gabriel J Crawford<sup>3</sup>, Pekka Jousilahti<sup>48</sup>, Markus Perola<sup>48,49</sup>, Michael Boehnke<sup>7</sup>, Lori L Bonnycastle<sup>50</sup>, Francis S Collins<sup>50</sup>, Anne U Jackson<sup>7</sup>, Karen L Mohlke<sup>51</sup>, Heather M Stringham<sup>7</sup>, Timo T Valle<sup>52</sup>, Cristen J Willer<sup>7</sup>, Richard N Bergman<sup>53</sup>, Mario A Morken<sup>50</sup>, Angela Döring<sup>15</sup>, Christian Gieger<sup>15</sup>, Thomas Illig<sup>15</sup>, Thomas Meitinger<sup>54,55</sup>, Elin Org<sup>56</sup>, Arne Pfeufer<sup>54</sup>, H Erich Wichmann<sup>15,57</sup>, Sekar Kathiresan<sup>1,2,3</sup>, Jaume Marrugat<sup>31</sup>, Christopher J O'Donnell<sup>58,59</sup>, Stephen M Schwartz<sup>60</sup>, David S Siscovick<sup>60</sup>, Isaac Subirana<sup>31,62</sup>, Nelson B Freimer<sup>63</sup>, Anna-Liisa Hartikainen<sup>64</sup>, Mark I McCarthy<sup>19,61,65</sup>, Paul F O'Reilly<sup>9</sup>, Leena Peltonen<sup>39,49</sup>, Anneli Pouta<sup>66</sup>, Paul E de Jong<sup>68</sup>, Harold Snieder<sup>69</sup>, Wiek H van Gilst<sup>26</sup>, Robert Clarke<sup>70</sup>, Anuj Goel<sup>18,19</sup>, Anders Hamsten<sup>71</sup>, John F Peden<sup>18,19</sup>, Udo Seedorf<sup>72</sup>, Ann-Christine Syvänen<sup>73</sup>, Giovanni Tognoni<sup>74</sup>, Edward G Lakatta<sup>10</sup>, Serena Sanna<sup>75</sup>, Paul Scheet<sup>76</sup>, David Schlessinger<sup>77</sup>, Angelo Scuteri<sup>78</sup>, Marcus Dörr<sup>79</sup>, Florian Ernst<sup>30</sup>, Stephan B Felix<sup>79</sup>, Georg Homuth<sup>30</sup>, Roberto Lorbeer<sup>80</sup>, Thorsten Reffelmann<sup>79</sup>, Rainer Rettig<sup>81</sup>, Uwe Völker<sup>30</sup>, Pilar Galan<sup>82</sup>, Ivo G Gut<sup>13</sup>, Serge Hercberg<sup>82</sup>, G Mark Lathrop<sup>13</sup>, Diana Zeleneka<sup>13</sup>, Panos Deloukas<sup>12,39</sup>, Nicole Soranzo<sup>17,39</sup>, Frances M Williams<sup>17</sup>, Guangju Zhai<sup>17</sup>, Veikko Salomaa<sup>48</sup>, Markku Laakso<sup>32</sup>, Roberto Elosua<sup>31,62</sup>, Nita G Forouhi<sup>11</sup>, Henry Völzke<sup>80</sup>, Cuno S Uiterwaal<sup>28</sup>, Yvonne T van der Schouw<sup>28</sup>, Mattijs E Numans<sup>28</sup>, Giuseppe Matullo<sup>27,45</sup>, Gerjan Navis<sup>68</sup>, Göran Berglund<sup>25</sup>, Sheila A Bingham<sup>12,83</sup>, Jaspal S Kooner<sup>84</sup>, Andrew D Paterson<sup>85</sup>, John M Connell<sup>36</sup>, Stefania Bandinelli<sup>86</sup>, Luigi Ferrucci<sup>21</sup>, Hugh Watkins<sup>18,19</sup>, Tim D Spector<sup>17</sup>, Jaakko Tuomilehto<sup>52,87,88</sup>, David Altshuler<sup>1,3,89,90</sup>, David P Strachan<sup>16</sup>, Maris Laan<sup>56</sup>, Pierre Meneton<sup>91</sup>, Nicholas J Wareham<sup>11,12</sup>, Manuela Uda<sup>75</sup>, Marjo-Riitta Jarvelin<sup>9,67,92</sup>, Vincent Mooser<sup>41</sup>, Olle Melander<sup>25</sup>, Ruth JF Loos<sup>11,12</sup>, Paul Elliott<sup>9,95</sup>, Gonçalo R Abecasis<sup>93,95</sup>, Mark Caulfield<sup>22,95</sup>, Patricia B Munroe<sup>22,95</sup>

1. Center for Human Genetic Research, Massachusetts General Hospital, Boston, Massachusetts 02114, USA.
2. Cardiovascular Research Center, Massachusetts General Hospital, Boston, Massachusetts 02114, USA.
3. Program in Medical and Population Genetics, Broad Institute of Harvard and Massachusetts Institute of Technology, Cambridge, Massachusetts, 02142, USA.
4. Department of Medical Genetics, University of Lausanne, 1005 Lausanne, Switzerland.



5. University Institute for Social and Preventative Medicine, Centre Hospitalier Universitaire Vaudois (CHUV) and University of Lausanne, 1005 Lausanne, Switzerland.
6. Swiss Institute of Bioinformatics, Switzerland.
7. Center for Statistical Genetics, Department of Biostatistics, University of Michigan School of Public Health, Ann Arbor, Michigan 48109, USA.
8. Departments of Health Sciences & Genetics, Adrian Building, University of Leicester, University Road, Leicester LE1 7RH.
9. Department of Epidemiology and Public Health, Imperial College London, Norfolk Place, London W2 1PG, UK.
10. Laboratory of Cardiovascular Science, Intramural Research Program, National Institute on Aging, National Institutes of Health, Baltimore, Maryland, USA 21224.
11. MRC Epidemiology Unit, Institute of Metabolic Science, Addenbrooke's Hospital, Cambridge CB2 0QQ, UK.
12. Cambridge - Genetics of Energy Metabolism (GEM) Consortium, Cambridge, UK.
13. Centre National de Génotypage/IG/CEA, 2 rue Gaston Crémieux CP 5721, 91057 Evry Cedex, France.
14. Pontificia Universidad Católica de Chile, Vicuña Mackenna 4860, Facultad de Matemáticas, Casilla 306, Santiago 22, Chile, 7820436.
15. Institute of Epidemiology, Helmholtz Zentrum München, Neuherberg, Germany.
16. Division of Community Health Sciences, St George's, University of London, London. SW17 0RE, UK.
17. Twin Research & Genetic Epidemiology Department, King's College London, St Thomas' Hospital Campus, Lambeth Palace Rd, London SE1 7EH, UK.
18. Department of Cardiovascular Medicine, University of Oxford, Oxford OX3 9DU, UK.
19. The Wellcome Trust Centre for Human Genetics, Roosevelt Drive, Oxford, OX3 7BN, UK.
20. Medstar Research Institute, 3001 S. Hanover Street, Baltimore, Maryland 21250, USA.
21. Clinical Research Branch, National Institute on Aging, Baltimore, Maryland 21250 USA.
22. Clinical Pharmacology and The Genome Centre, William Harvey Research Institute, Barts and The London School of Medicine and Dentistry, Queen Mary University of London, London EC1M 6BQ.
23. JDRF/WT Diabetes and Inflammation Laboratory, Cambridge Institute for Medical Research University of Cambridge, Wellcome Trust/MRC Building, Addenbrooke's Hospital Cambridge, CB2 0XY.
24. Department of Public Health and Primary Care, Strangeways Research Laboratory, University of Cambridge, Cambridge, UK.
25. Department of Clinical Sciences, Lund University, Malmö University Hospital, SE 20502 Malmö, Sweden.
26. Department of Cardiology University Medical Center Groningen, University of Groningen, Hanzeplein 1, 9700 RB Groningen, The Netherlands.
27. ISI Foundation (Institute for Scientific Interchange), Villa Gualino, Torino, 10133, Italy.
28. Julius Center for Health Sciences and Primary Care, University Medical Center Utrecht, STR 6.131, PO Box 85500, 3508 GA Utrecht, The Netherlands.
29. Complex Genetics Section, Department of Medical Genetics - DBG, University Medical Center Utrecht, STR 2.2112, PO Box 85500, 3508 GA Utrecht, The Netherlands..
30. Interfaculty Institute for Genetics and Functional Genomics, Ernst-Moritz-Arndt-University Greifswald, 17487 Greifswald, Germany.
31. Cardiovascular Epidemiology and Genetics, Institut Municipal d'Investigació Mèdica,.

Barcelona, Spain.

32. Department of Medicine, University of Kuopio and Kuopio University Hospital, Kuopio 70210, Finland.

33. ALSPAC Laboratory, Department of Social Medicine, University of Bristol, BS8 2BN, UK.

34. For full list of authors, please refer to Wellcome Trust Case Control Consortium Nature 447, 661–678 (2007).

35. Clinical Pharmacology Unit, University of Cambridge, Addenbrookes Hospital, Cambridge, UK CB2 2QQ.

36. BHF Glasgow Cardiovascular Research Centre, University of Glasgow, Glasgow, UK G12 8TA.

37. Dept of Cardiovascular Science, University of Leicester, Glenfield Hospital, Groby Road, Leicester, LE3 9QP, UK.

38. Aberdeen Royal Infirmary, Aberdeen, UK.

39. Wellcome Trust Sanger Institute, Hinxton, Cambridge CB10 1SA, UK.

40. Service of Medical Genetics, Centre Hospitalier Universitaire Vaudois (CHUV), Lausanne, 1011, Switzerland.

41. Medical Genetics/Clinical Pharmacology and Discovery Medicine, Glaxo SmithKline, King of Prussia, Pennsylvania 19406, USA.

42. Department of Internal Medicine, Centre Hospitalier Universitaire Vaudois (CHUV), 1011 Lausanne, Switzerland.

43. Department of Clinical Sciences, Diabetes and Endocrinology Research Unit, University Hospital, Malmö.

44. Lund University, Malmö S-205 02, Sweden.

45. Department of Genetics, Biology and Biochemistry, University of Torino, Torino, 10126, Italy.

46. Department of Clinical and Experimental Medicine, Federico II University, Naples, 80100, Italy.

47. Unit of Cancer Epidemiology, University of Turin and Centre for Cancer Epidemiology and Prevention (CPO Piemonte), Turin, 10126, Italy.

48. National Institute for Health and Welfare, Unit of Chronic Disease Epidemiology and Prevention, Helsinki, Finland.

49. Institute for Molecular Medicine Finland FIMM, University of Helsinki, Helsinki, Finland.

50. Genome Technology Branch, National Human Genome Research Institute, Bethesda, Maryland 20892, USA.

51. Department of Genetics, University of North Carolina, Chapel Hill, North Carolina 27599, USA.

52. National Institute for Health and Welfare, Unit of Diabetes Prevention, Helsinki, Finland.

53. Physiology and Biophysics USC School of Medicine 1333 San Pablo Street, MMR 626. Los Angeles, California 90033.

54. Institute of Human Genetics, Helmholtz Zentrum München, German Research Centre for Environmental Health, 85764 Neuherberg, Germany.

55. Institute of Human Genetics, Technische Universität München, 81675 Munich, Germany.

56. Institute of Molecular and Cell Biology, University of Tartu, 51010 Tartu, Estonia.

57. Institute of Medical Informatics, Biometry and Epidemiology, Ludwig-Maximilians-Universität, Munich, Germany.

58. Cardiovascular Research Center and Cardiology Division, Massachusetts General.

Hospital, Boston, Massachusetts 02114, USA.

59. Framingham Heart Study and National, Heart, Lung, and Blood Institute, Framingham, Massachusetts 01702, USA.

60. Cardiovascular Health Research Unit, Departments of Medicine and Epidemiology, University of Washington, Seattle, Washington, 98101 USA.

61. Oxford NIHR Biomedical Research Centre, Churchill Hospital, Oxford OX3 7LJ, UK.

62. CIBER Epidemiología y Salud Pública, Barcelona, Spain.

63. Center for Neurobehavioral Genetics, Gonda Center, Room 3506, 695 Charles E Young Drive South, Box 951761, UCLA, Los Angeles, CA 90095.

64. Department of Clinical Sciences, Obstetrics and Gynecology, University of Oulu, Box 5000, Fin-90014 University of Oulu, Finland.

65. Oxford Centre for Diabetes, Endocrinology and Metabolism, University of Oxford, Churchill Hospital, Old Road, Headington, Oxford OX3 7LJ, UK.

66. Department of Clinical Genetics, VUMC, Van der Boechorststraat 7, 1081 BT Amsterdam, The Netherlands.

67. Department of Child and Adolescent Health, National Public Health Institute (KTL), Aapistie 1, P.O. Box 310, FIN-90101 Oulu, Finland.

68. Division of Nephrology, Department of Medicine University Medical Center Groningen, University of Groningen, Hanzeplein 1, 9700 RB Groningen, The Netherlands.

69. Unit of Genetic Epidemiology and Bioinformatics, Department of Epidemiology, University Medical Center Groningen, University of Groningen, Hanzeplein 1, 9700 RB. Groningen, The Netherlands.

70. Clinical Trial Service Unit and Epidemiological Studies Unit, University of Oxford, Oxford OX3 7LF, UK.

71. Atherosclerosis Research Unit, Department of Medicine, Karolinska Institutet Stockholm, Sweden.

72. Leibniz-Institut für Arterioskleroseforschung an der Universität Münster, Münster, Germany.

73. Department of Medical Sciences, Uppsala University, Uppsala, Sweden.

74. Consorzio Mario Negri Sud, Via Nazionale, 66030 Santa Maria Imbaro (Chieti), Italy.

75. Istituto di Neurogenetica e Neurofarmacologia (INN), Consiglio Nazionale delle Ricerche, c/o Cittadella Universitaria di Monserrato, Monserrato, Cagliari 09042, Italy .

76. Department of Epidemiology, Univ. of Texas M. D. Anderson Cancer Center, Houston, Texas 77030, USA.

77. Genome Technology Branch, National Human Genome Research Institute, Bethesda, Maryland 20892, USA.

78. 28 UO Geriatria - Istituto Nazionale Ricovero e Cura per Anziani (INRCA IRCCS) - Rome, Italy.

79. Department of Internal Medicine B, Ernst-Moritz-Arndt-University Greifswald, 17487. Greifswald, Germany.

80. Institute for Community Medicine, Ernst-Moritz-Arndt-University Greifswald, 17487. Greifswald, Germany.

81. Institute of Physiology, Ernst-Moritz-Arndt-University Greifswald, 17487 Greifswald, Germany.

82. U557 Institut National de la Santé et de la Recherche Médicale, U1125 Institut National de la Recherche Agronomique, Université Paris 13, 74 rue Marcel Cachin, 93017 Bobigny Cedex, France.

83. MRC Dunn Human Nutrition Unit, Wellcome Trust/MRC Building, Cambridge CB2 0XY, UK.
84. National Heart and Lung Institute, Imperial College London SW7 2AZ.
85. Program in Genetics and Genome Biology, Hospital for Sick Children, Toronto, Canada, Dalla Lana School of Public Health, University of Toronto, Toronto, Canada M5T 3M7.
86. Geriatric Rehabilitation Unit, Azienda Sanitaria Firenze (ASF), 50125, Florence, Italy.
87. Department of Public Health, University of Helsinki, 00014 Helsinki, Finland.
88. South Ostrobothnia Central Hospital, 60220 Seinäjoki, Finland.
89. Department of Medicine and Department of Genetics, Harvard Medical School, Boston, Massachusetts 02115, USA.
90. Diabetes Unit, Massachusetts General Hospital, Boston, Massachusetts 02114, USA.
91. U872 Institut National de la Santé et de la Recherche Médicale, Faculté de Médecine. Paris Descartes, 15 rue de l'École de Médecine, 75270 Paris Cedex, France.
92. Institute of Health Sciences and Biocenter Oulu, Box 5000, Fin-90014 University of Oulu, Finland.
93. Center for Statistical Genetics, Department of Biostatistics, University of Michigan, Ann Arbor, Michigan 48109 USA.

Supplementary Table 1a: Study characteristics and details of analysis metrics and methods for all Stage 1 discovery cohorts [attached in Excel]

Supplementary Table 1b: Study characteristics and details of analysis metrics and methods for all Stage 2 replication cohorts [attached in Excel]

Supplementary Table 2: Association statistics for single nucleotide polymorphisms that did not reach genome-wide significance ( $P < 5 \times 10^{-8}$ )

| Glucose/HOMA-B selected SNPs  |                    |               |                   |      | Fasting glucose      |                     |                           |                      |                  | HOMA-B               |                     |                           |                      |                  |
|-------------------------------|--------------------|---------------|-------------------|------|----------------------|---------------------|---------------------------|----------------------|------------------|----------------------|---------------------|---------------------------|----------------------|------------------|
| SNP                           | Nearest gene       | Effect allele | Non-effect allele | Freq | Discovery P value    | Replication P value | Replication beta $\pm$ SE | Global P value       | Joint Analysis N | Discovery P value    | Replication P value | Replication beta $\pm$ SE | Global P value       | Joint Analysis N |
| rs457420                      | <i>CRSP8/BRD3</i>  | T             | C                 | 0.43 | $1.6 \times 10^{-5}$ | 0.305               | $0.003 \pm 0.003$         | $8.8 \times 10^{-4}$ | 108,256          | 0.571                | 0.250               | $-0.004 \pm 0.003$        | 0.738                | 85,508           |
| rs4243291                     | <i>FLJ44881</i>    | A             | G                 | 0.21 | $3.5 \times 10^{-6}$ | 0.228               | $0.006 \pm 0.005$         | 0.026                | 108,565          | 0.163                | 0.366               | $-0.005 \pm 0.005$        | 0.397                | 84,557           |
| rs10493846                    | <i>HFM1</i>        | T             | G                 | 0.26 | 0.195                | 0.606               | $-0.002 \pm 0.004$        | 0.277                | 102,196          | $3.4 \times 10^{-6}$ | 0.810               | $-0.001 \pm 0.004$        | 0.003                | 78,974           |
| Insulin/HOMA-IR selected SNPs |                    |               |                   |      | Fasting insulin      |                     |                           |                      |                  | HOMA-IR              |                     |                           |                      |                  |
| rs4912494                     | <i>CHRD/EPHB3</i>  | T             | G                 | 0.34 | $1.7 \times 10^{-6}$ | 0.173               | $-0.006 \pm 0.005$        | $1.1 \times 10^{-5}$ | 77,011           | $2.6 \times 10^{-6}$ | 0.207               | $-0.006 \pm 0.005$        | $2.2 \times 10^{-5}$ | 77,837           |
| rs11167682                    | <i>BCO42059</i>    | T             | G                 | 0.24 | $2.4 \times 10^{-5}$ | 0.130               | $0.007 \pm 0.004$         | $5.6 \times 10^{-5}$ | 82,878           | $6.5 \times 10^{-6}$ | 0.117               | $0.006 \pm 0.005$         | $3.9 \times 10^{-5}$ | 81,256           |
| rs6479526                     | <i>PTPDC1</i>      | T             | C                 | 0.21 | $2.5 \times 10^{-5}$ | 0.564               | $0.003 \pm 0.004$         | $5.0 \times 10^{-4}$ | 90,670           | $4.5 \times 10^{-6}$ | 0.493               | $0.003 \pm 0.005$         | $1.8 \times 10^{-4}$ | 89,183           |
| rs4675095                     | <i>IRS1</i>        | A             | T                 | 0.94 | $8.5 \times 10^{-4}$ | 0.432               | $-0.006 \pm 0.008$        | $3.9 \times 10^{-3}$ | 91,210           | $1.1 \times 10^{-4}$ | 0.851               | $-0.002 \pm 0.008$        | $4.6 \times 10^{-3}$ | 89,831           |
| rs588262                      | <i>RBM26</i>       | T             | C                 | 0.96 | $6.5 \times 10^{-6}$ | 0.904               | $-0.001 \pm 0.010$        | 0.018                | 85,387           | $1.5 \times 10^{-6}$ | 0.984               | $0.0002 \pm 0.010$        | 0.010                | 83,936           |
| rs1416802                     | <i>PLXDC2/NEBL</i> | A             | G                 | 0.77 | 0.007                | 0.947               | $0.0003 \pm 0.004$        | 0.063                | 91,231           | 0.004                | 0.688               | $0.002 \pm 0.004$         | 0.027                | 89,742           |
| rs6947696                     | <i>CDK6/SAMD9</i>  | A             | G                 | 0.13 | $7.3 \times 10^{-6}$ | 0.733               | $-0.002 \pm 0.007$        | 0.087                | 78,775           | $4.7 \times 10^{-5}$ | 0.504               | $-0.005 \pm 0.007$        | 0.183                | 77,333           |

Directly genotyped and imputed single nucleotide polymorphisms (SNPs) were assessed for association with fasting glucose, fasting insulin, and homeostasis model assessment of  $\beta$ -cell function (HOMA-B) and insulin resistance (HOMA-IR). Twenty one discovery cohorts with genome-wide data were meta-analyzed (discovery) and 25 SNPs were promoted for replication of the same trait in an additional set of 33 cohorts with *in silico* or *de novo* genotype data (replication). A joint analysis was then performed (global). The beta coefficients are obtained from the replication cohorts so as to avoid an overestimate of the effect size caused by the “winner’s curse”. Freq denotes the allele frequency of the effect allele. N=sample size. Global P values adjusted for body mass index did not significantly change the results.

Supplementary Table 3: Effects of known type 2 diabetes-associated loci on fasting glucose-related and insulin-related traits in MAGIC

| Marker     | chr | position<br>(NCBI 35) | gene     | risk<br>allele | other<br>allele | DIAGRAM T2D         |                         | Fasting glucose           |                         | Fasting insulin             |                        | HOMA-B                      |                        | HOMA-IR                     |                        |
|------------|-----|-----------------------|----------|----------------|-----------------|---------------------|-------------------------|---------------------------|-------------------------|-----------------------------|------------------------|-----------------------------|------------------------|-----------------------------|------------------------|
|            |     |                       |          |                |                 | OR<br>(95% CI)      | P-value                 | Effect<br>(95% CI)        | P-value                 | Effect<br>(95% CI)          | P-value                | Effect<br>(95% CI)          | P-value                | Effect<br>(95% CI)          | P-value                |
| rs10923931 | 1   | 120,230,001           | NOTCH2   | T              | G               | 1.23<br>(1.12-1.35) | 6.9 x 10 <sup>-6</sup>  | 0.011<br>(-0.001 - 0.022) | 0.068                   | -0.001<br>(-0.012 - 0.011)  | 0.935                  | -0.005<br>(-0.015 - 0.006)  | 0.382                  | 0.001<br>(-0.011 - 0.014)   | 0.869                  |
| rs7578597  | 2   | 43,644,474            | THADA    | T              | C               | 1.23<br>(1.11-1.37) | 1.1 x 10 <sup>-4</sup>  | 0.026<br>(0.014 - 0.037)  | 2.4 x 10 <sup>-5</sup>  | -0.013<br>(-0.026 - 0.000)  | 0.056                  | -0.023<br>(-0.035 - -0.012) | 7.0 x 10 <sup>-5</sup> | -0.009<br>(-0.023 - 0.004)  | 0.189                  |
| rs1801282  | 3   | 12,368,125            | PPARG    | C              | G               | 1.19<br>(1.09-1.30) | 2.0 x 10 <sup>-4</sup>  | 0.013<br>(0.003 - 0.024)  | 0.014                   | 0.016<br>(0.005 - 0.026)    | 5.5 x 10 <sup>-3</sup> | 0.006<br>(-0.003 - 0.015)   | 0.181                  | 0.016<br>(0.005 - 0.027)    | 5.6 x 10 <sup>-3</sup> |
| rs4607103  | 3   | 64,686,944            | ADAMTS9  | C              | T               | 1.15<br>(1.06-1.23) | 3.1 x 10 <sup>-4</sup>  | 0.01<br>(0.001 - 0.018)   | 0.026                   | 0.006<br>(-0.002 - 0.015)   | 0.152                  | 0.001<br>(-0.007 - 0.009)   | 0.827                  | 0.006<br>(-0.004 - 0.015)   | 0.235                  |
| rs1470579  | 3   | 187,011,782           | IGF2BP2  | C              | A               | 1.17<br>(1.10-1.25) | 3.1 x 10 <sup>-7</sup>  | 0.009<br>(0.001 - 0.017)  | 0.019                   | -0.007<br>(-0.015 - 0.001)  | 0.099                  | -0.011<br>(-0.018 - -0.004) | 1.4 x 10 <sup>-3</sup> | -0.008<br>(-0.017 - 0.000)  | 0.047                  |
| rs10010131 | 4   | 6,410,987             | WFS1     | G              | A               | 1.10<br>(1.03-1.16) | 4.0 x 10 <sup>-3</sup>  | 0.018<br>(0.011 - 0.025)  | 9.4 x 10 <sup>-7</sup>  | 0.010<br>(-0.001 - 0.014)   | 0.097                  | -0.010<br>(-0.010 - 0.003)  | 0.318                  | -0.010<br>(0.001 - 0.016)   | 0.035                  |
| rs7756992  | 6   | 20,787,688            | CDKAL1   | G              | A               | 1.26<br>(1.18-1.34) | 2.0 x 10 <sup>-11</sup> | 0.006<br>(0.001 - 0.018)  | 0.020                   | -0.002<br>(-0.019 - -0.002) | 0.011                  | -0.004<br>(-0.017 - -0.002) | 7.5 x 10 <sup>-3</sup> | -0.001<br>(-0.001 - -0.001) | 0.029                  |
| rs864745   | 7   | 27,953,796            | JAZF1    | T              | C               | 1.15<br>(1.08-1.22) | 4.6 x 10 <sup>-5</sup>  | 0.027<br>(-0.001 - 0.013) | 0.117                   | -0.004<br>(-0.01 - 0.005)   | 0.583                  | -0.016<br>(-0.010 - 0.003)  | 0.283                  | 0.000<br>(0.007 - 0.007)    | 0.771                  |
| rs13266634 | 8   | 118,253,964           | SLC30A8  | C              | T               | 1.10<br>(1.02-1.19) | 0.033                   | 0.019<br>(0.018 - 0.036)  | 5.5 x 10 <sup>-10</sup> | 0.003<br>(-0.013 - 0.005)   | 0.441                  | -0.009<br>(-0.023 - -0.009) | 2.4 x 10 <sup>-5</sup> | 0.005<br>(-0.010 - 0.009)   | 0.969                  |
| rs10811661 | 9   | 22,124,094            | CDKN2A/B | T              | C               | 1.26<br>(1.16-1.37) | 2.0 x 10 <sup>-7</sup>  | 0.016<br>(0.009 - 0.028)  | 1.0 x 10 <sup>-4</sup>  | 0.000<br>(-0.007 - 0.012)   | 0.612                  | -0.011<br>(-0.017 - 0.000)  | 0.051                  | -0.001<br>(0.016 - 0.016)   | 0.301                  |
| rs12779790 | 10  | 12,368,016            | CDC123   | G              | A               | 1.17<br>(1.09-1.27) | 4.7 x 10 <sup>-5</sup>  | 0.009<br>(0.006 - 0.025)  | 1.2 x 10 <sup>-3</sup>  | 0.002<br>(-0.011 - 0.010)   | 0.940                  | -0.004<br>(-0.019 - -0.002) | 0.015                  | 0.003<br>(-0.012 - 0.010)   | 0.851                  |
| rs1111875  | 10  | 94,452,862            | HHEX     | C              | T               | 1.18<br>(1.11-1.25) | 4.0 x 10 <sup>-7</sup>  | 0.023<br>(0.002 - 0.016)  | 0.014                   | -0.012<br>(-0.006 - 0.009)  | 0.669                  | -0.020<br>(-0.011 - 0.002)  | 0.203                  | -0.010<br>(-0.005 - 0.011)  | 0.487                  |
| rs7903146  | 10  | 114,748,339           | TCF7L2   | T              | C               | 1.40<br>(1.31-1.50) | 3.1 x 10 <sup>-23</sup> | 0.031<br>(0.015 - 0.031)  | 2.8 x 10 <sup>-8</sup>  | -0.004<br>(-0.021 - -0.004) | 4.6 x 10 <sup>-3</sup> | -0.013<br>(-0.027 - -0.013) | 1.4 x 10 <sup>-7</sup> | -0.001<br>(-0.018 - -0.001) | 0.034                  |

|                            |    |            |        |   |   |                     |                        |                            |       |                            |                        |                             |       |                             |                        |
|----------------------------|----|------------|--------|---|---|---------------------|------------------------|----------------------------|-------|----------------------------|------------------------|-----------------------------|-------|-----------------------------|------------------------|
| rs2237892                  | 11 | 2,796,327  | KCNQ1  | C | T | 1.18<br>(1.03-1.34) | 0.014                  | 0.011<br>(-0.005 - 0.334)  | 0.165 | -0.019<br>(-0.035 - 0.041) | 0.031                  | -0.020<br>(-0.034 - -0.006) | 0.006 | -0.019<br>(-0.036 - -0.001) | 0.036                  |
| rs5215                     | 11 | 17,365,206 | KCNJ11 | C | T | 1.17<br>(1.10-1.24) | 4.1 x 10 <sup>-7</sup> | -0.003<br>(-0.011 - 0.004) | 0.401 | -0.002<br>(-0.01 - 0.006)  | 0.587                  | 0.001<br>(-0.006 - 0.007)   | 0.780 | -0.002<br>(-0.010 - 0.006)  | 0.655                  |
| rs7961581                  | 12 | 69,949,369 | TSPAN8 | C | T | 1.17<br>(1.10-1.25) | 3.7 x 10 <sup>-5</sup> | 0.006<br>(-0.002 - 0.015)  | 0.122 | -0.002<br>(-0.011 - 0.006) | 0.603                  | -0.001<br>(-0.009 - 0.006)  | 0.711 | 0.001<br>(-0.008 - 0.010)   | 0.845                  |
| rs9939609                  | 16 | 52,378,028 | FTO    | A | T | 1.14<br>(1.07-1.21) | 1.7 x 10 <sup>-5</sup> | 0.003<br>(-0.001 - 0.013)  | 0.095 | -0.006<br>(0.007 - 0.022)  | 1.9 x 10 <sup>-4</sup> | -0.009<br>(0.001 - 0.014)   | 0.023 | -0.011<br>(0.007 - 0.022)   | 3.2 x 10 <sup>-4</sup> |
| rs757210                   | 17 | 33,170,628 | TCF2   | T | C | na                  | na                     | -0.008<br>(-0.008 - 0.013) | 0.614 | -0.018<br>(-0.018 - 0.005) | 0.264                  | -0.018<br>(-0.018 - 0.000)  | 0.043 | -0.023<br>(-0.023 - 0.000)  | 0.058                  |
| Sample size for each trait |    |            |        |   |   |                     |                        | 27,858 - 46,186            |       | 21,140 - 38,244            |                        | 19,680 - 36,466             |       | 19,812 - 36,946             |                        |



Supplementary Table 4: Known effects of human mutations and null mouse phenotypes for selected genes around novel fasting glucose and insulin-associated loci

| Lead SNP   | Genes in region | Distance to gene (bp) | Function/Expression                                                                                                                                           | Human Disease |                                       | Mouse Knockout                                                                                                                                                                                                                                                                                                                            |                |             |                |               | PubMed                           |
|------------|-----------------|-----------------------|---------------------------------------------------------------------------------------------------------------------------------------------------------------|---------------|---------------------------------------|-------------------------------------------------------------------------------------------------------------------------------------------------------------------------------------------------------------------------------------------------------------------------------------------------------------------------------------------|----------------|-------------|----------------|---------------|----------------------------------|
|            |                 |                       |                                                                                                                                                               | OMIM          | Phenotype                             | Metabolism/homeostasis                                                                                                                                                                                                                                                                                                                    | Adipose tissue | Growth/Size | Cardiovascular | Other systems |                                  |
| rs2191349  | <i>DGKB</i>     | 121,475               | Diacylglycerol (DAG) kinase, regulator of second messenger DAG<br><br>Brain                                                                                   |               |                                       |                                                                                                                                                                                                                                                                                                                                           |                |             |                |               | 7689223<br>17021016              |
| rs2191349  | <i>TMEM195</i>  | 175,634               | Encodes transmembrane protein 195, an integral membrane phosphoprotein<br><br>Highly expressed in liver                                                       |               |                                       |                                                                                                                                                                                                                                                                                                                                           |                |             |                |               |                                  |
| rs11708067 | <i>ADCY5</i>    | Intronic              | Adenylate cyclase 5, synthesis of cAMP<br><br>Highly expressed in heart                                                                                       |               |                                       | <b>Other systems:</b> Targeted inactivation of this gene has been shown to result in motor dysfunction                                                                                                                                                                                                                                    |                |             |                |               | 12503609<br>12665504<br>12223546 |
| rs11708067 | <i>SEC22A</i>   | 74,425                | Encodes interacting proteins that may play a role in endoplasmic reticulum (ER)-Golgi transport                                                               |               |                                       |                                                                                                                                                                                                                                                                                                                                           |                |             |                |               | 8621431                          |
| rs11708067 | <i>PDIA5</i>    | 184,828               | Protein disulfide isomerase family A, member 5                                                                                                                |               |                                       |                                                                                                                                                                                                                                                                                                                                           |                |             |                |               | 14627699                         |
| rs7944584  | <i>MADD</i>     | Intronic              | Death domain-containing adaptor protein, interacts with the death domain of TNF-alpha receptor 1, propagates apoptotic signal<br><br>Brain, white blood cells |               |                                       | <b>Other systems:</b> Neonatal lethality; nervous system phenotype; respiratory system phenotype; hyporesponsive to tactile stimuli                                                                                                                                                                                                       |                |             |                |               | 11359932                         |
| rs7944584  | <i>MYBPC3</i>   | 16,637                | Encodes the cardiac isoform of myosin-binding protein C.<br><br>Expressed exclusively in heart muscle                                                         | 115197        | CARDIOMYOPATHY, FAMILIAL HYPERTROPHIC | <b>Cardiovascular:</b> Numerous cardiovascular problems                                                                                                                                                                                                                                                                                   |                |             |                |               | 15737656                         |
| rs7944584  | <i>SPI1</i>     | 40,089                | Encodes an ETS-domain transcription factor that activates gene expression during myeloid and B-lymphoid cell development                                      |               |                                       | <b>Growth/Size:</b> Postnatal growth retardation<br><br><b>Other systems:</b> Abnormal blood development; abnormal erythrocyte count; decreased B lymphocyte count; spleen abnormalities; premature death; enlarged liver; abnormal bone marrow morphology; increased tumor incidence; abnormal eye development; B & T cell abnormalities |                |             |                |               | 16432184<br>15328162<br>8896458  |

| Lead SNP  | Genes in region | Distance to gene (bp) | Function/Expression                                                                                                                                                                                                                                                                                     | Human Disease |                                                                                    | Mouse Knockout         |                |             |                |               | PubMed                                      |
|-----------|-----------------|-----------------------|---------------------------------------------------------------------------------------------------------------------------------------------------------------------------------------------------------------------------------------------------------------------------------------------------------|---------------|------------------------------------------------------------------------------------|------------------------|----------------|-------------|----------------|---------------|---------------------------------------------|
|           |                 |                       |                                                                                                                                                                                                                                                                                                         | OMIM          | Phenotype                                                                          | Metabolism/homeostasis | Adipose tissue | Growth/Size | Cardiovascular | Other systems |                                             |
|           |                 |                       | Myeloid and B cells                                                                                                                                                                                                                                                                                     |               |                                                                                    |                        |                |             |                |               |                                             |
| rs7944584 | <i>NR1H3</i>    | 45,924                | Liver X receptor alpha. Liver X receptors (LXRs) are established mediators of lipid-inducible gene expression<br><br>Expressed in metabolically active tissues, such as liver, kidney, intestines, and the adrenal glands                                                                               |               |                                                                                    |                        |                |             |                |               | 10809236<br>9630215<br>17657314<br>15372105 |
| rs7944584 | <i>ACP2</i>     | 65,957                | This gene encodes the beta subunit of lysosomal acid phosphatase (LAP)<br><br>Lysosomal compartment                                                                                                                                                                                                     |               |                                                                                    |                        |                |             |                |               | 15503243<br>9228031                         |
| rs7944584 | <i>DDB2</i>     | 75,557                | Encodes a protein that is necessary for the repair of ultraviolet light-damaged DNA<br><br>Ubiquitously expressed; with highest levels in corneal endothelium and lowest levels in brain. Isoform D1 is highly expressed in brain and heart. Isoform D2, isoform D3 and isoform D4 are weakly expressed |               |                                                                                    |                        |                |             |                |               | 10713455<br>17967871<br>18936169            |
| rs7944584 | <i>SLC39A13</i> | 93,862                | SLC39A13 belongs to a subfamily of proteins that show structural characteristics of zinc transporters                                                                                                                                                                                                   | 612350        | SPONDYLOCHEIRODYSPLASIA, EHLERS-DANLOS SYNDROME-LIKE                               |                        |                |             |                |               | 12659941<br>18513683                        |
| rs7944584 | <i>PSMC3</i>    | 104,000               | Involved in the ATP-dependent degradation of ubiquitinated proteins                                                                                                                                                                                                                                     |               |                                                                                    |                        |                |             |                |               | 8419915                                     |
| rs7944584 | <i>RAPSN</i>    | 122,988               | Receptor-associated protein of the synapse; contains a conserved cAMP-dependent protein kinase phosphorylation site                                                                                                                                                                                     | 608931        | MYASTHENIC SYNDROME, CONGENITAL, ASSOCIATED WITH ACETYLCHOLINE RECEPTOR DEFICIENCY |                        |                |             |                |               | 3170600<br>17119023<br>12832540             |

| Lead SNP          | Genes in region    | Distance to gene (bp) | Function/Expression                                                                                                  | Human Disease |                                           | Mouse Knockout         |                |                                                                                                                                                                                                                                                                                                                                                                                                                                                                                                                                                                                                                      |                |               | PubMed                          |
|-------------------|--------------------|-----------------------|----------------------------------------------------------------------------------------------------------------------|---------------|-------------------------------------------|------------------------|----------------|----------------------------------------------------------------------------------------------------------------------------------------------------------------------------------------------------------------------------------------------------------------------------------------------------------------------------------------------------------------------------------------------------------------------------------------------------------------------------------------------------------------------------------------------------------------------------------------------------------------------|----------------|---------------|---------------------------------|
|                   |                    |                       |                                                                                                                      | OMIM          | Phenotype                                 | Metabolism/homeostasis | Adipose tissue | Growth/Size                                                                                                                                                                                                                                                                                                                                                                                                                                                                                                                                                                                                          | Cardiovascular | Other systems |                                 |
|                   |                    |                       |                                                                                                                      | 208150        | FETAL AKINESIA DEFORMATION SEQUENCE; FADS |                        |                |                                                                                                                                                                                                                                                                                                                                                                                                                                                                                                                                                                                                                      |                |               |                                 |
| rs7944584         | <i>PACSIN3</i>     | 128,362               | PACSINs are a family of cytoplasmic phosphoproteins that play a role in vesicle formation and transport              |               |                                           |                        |                |                                                                                                                                                                                                                                                                                                                                                                                                                                                                                                                                                                                                                      |                |               | 11082044<br>11179684            |
| rs7944584         | <i>ARFGAP2</i>     | 137,901               | GTPase-activating protein (GAP) for ADP ribosylation factor 1 (ARF1)                                                 |               |                                           |                        |                |                                                                                                                                                                                                                                                                                                                                                                                                                                                                                                                                                                                                                      |                |               | 19015319<br>17760859            |
| rs7944584         | <i>C11orf49</i>    | 150,393               |                                                                                                                      |               |                                           |                        |                |                                                                                                                                                                                                                                                                                                                                                                                                                                                                                                                                                                                                                      |                |               |                                 |
| rs7944584         | <i>CUGBP1</i>      | 153,626               | RNA-binding protein implicated in the regulation of several post-transcriptional events<br><br>Ubiquitous expression |               |                                           |                        |                | <b>Growth/Size:</b> Decreased body size; fetal growth retardation<br><b>Cardiovascular:</b> Dilated cardiomyopathy, arrhythmias, and systolic and diastolic dysfunction<br><b>Other systems:</b> Postnatal lethality; reproductive system abnormalities                                                                                                                                                                                                                                                                                                                                                              |                |               | 17823658<br>17130239            |
| rs7944584         | <i>PTPMT1</i>      | 250,855               | Mediates dephosphorylation of mitochondrial proteins, thereby playing an essential role in ATP production            |               |                                           |                        |                | <b>Metabolism/homeostasis:</b> Knockdown of Ptpmt1 expression in a rat pancreatic insulinoma cell line altered the mitochondrial phosphoprotein profile and enhanced both ATP production and insulin secretion.                                                                                                                                                                                                                                                                                                                                                                                                      |                |               | 16039589                        |
| rs7944584         | <i>KBTBD4</i>      | 257,430               |                                                                                                                      |               |                                           |                        |                |                                                                                                                                                                                                                                                                                                                                                                                                                                                                                                                                                                                                                      |                |               |                                 |
| rs7944584         | <i>NDUFS3</i>      | 264,312               | First enzyme complex in the electron transport chain of mitochondria                                                 |               |                                           |                        |                |                                                                                                                                                                                                                                                                                                                                                                                                                                                                                                                                                                                                                      |                |               | 19034380                        |
| rs7944584         | <i>C1QTNF4</i>     | 274,896               | Complement C1q tumor necrosis factor-related protein 4 precursor                                                     |               |                                           |                        |                |                                                                                                                                                                                                                                                                                                                                                                                                                                                                                                                                                                                                                      |                |               |                                 |
| rs7944584         | <i>MTCH2</i>       | 302,548               |                                                                                                                      |               |                                           |                        |                |                                                                                                                                                                                                                                                                                                                                                                                                                                                                                                                                                                                                                      |                |               | 15899861                        |
| <b>rs11605924</b> | <b><i>CRY2</i></b> | Intronic              | Cryptochrome 2, circadian regulator of calcium ion oscillation<br><br>Brain, prostate, heart, uterus                 |               |                                           |                        |                | <b>Metabolism/homeostasis:</b> Abnormal body temperature regulation; increased oxygen consumption; impaired glucose tolerance; increased insulin sensitivity<br><b>Adipose tissue:</b> Decreased adipose tissue amount ; decreased abdominal adipose tissue amount; decreased subcutaneous adipose tissue amount; abnormal brown adipose tissue morphology<br><b>Growth/Size:</b> Decreased body weight<br><b>Cardiovascular:</b> Abnormal vasoconstriction; increased heart rate<br><b>Other systems:</b> Abnormal circadian rhythm, period and phase; hypoactivity; nervous system phenotype; vision/eye phenotype |                |               | 9822380<br>10217146<br>15860530 |
| rs11605924        | <i>MAPK8IP1</i>    | 34,111                | The protein encoded by this gene is a regulator of the pancreatic beta-cell function                                 | 12583         | DIABETES MELLITUS, NONINSULIN-DEPENDENT   |                        |                | <b>Metabolism/ homeostasis:</b> Jip1 mutant mice were resistant to diet-induced obesity and showed reduced diet-induced insulin resistance.<br><b>Other systems:</b> Decreased susceptibility to ischemic brain injury; ataxia                                                                                                                                                                                                                                                                                                                                                                                       |                |               | 11390367<br>1531402             |

| Lead SNP   | Genes in region  | Distance to gene (bp) | Function/Expression                                                                                                                                                                                                                                                                                                                  | Human Disease |                                                       | Mouse Knockout                                                                                                                                                                                                                                   |                |             |                |               | PubMed                          |
|------------|------------------|-----------------------|--------------------------------------------------------------------------------------------------------------------------------------------------------------------------------------------------------------------------------------------------------------------------------------------------------------------------------------|---------------|-------------------------------------------------------|--------------------------------------------------------------------------------------------------------------------------------------------------------------------------------------------------------------------------------------------------|----------------|-------------|----------------|---------------|---------------------------------|
|            |                  |                       |                                                                                                                                                                                                                                                                                                                                      | OMIM          | Phenotype                                             | Metabolism/homeostasis                                                                                                                                                                                                                           | Adipose tissue | Growth/Size | Cardiovascular | Other systems |                                 |
| rs11605924 | <i>SLC35C1</i>   | 38,525                | Encodes a GDP-fucose transmembrane transporter (FucT1) located in the Golgi apparatus                                                                                                                                                                                                                                                | 266265        | CONGENITAL DISORDER OF GLYCOSYLATION, TYPE IIc; CDG2C | <b>Growth/Size:</b> Growth retardation<br><b>Other systems:</b> Partial perinatal and postnatal lethality; reduced fertility; leukocytosis; defective lung and primary lymph node development and altered lymphocyte rolling and adhesion        |                |             |                |               | 18541720                        |
| rs11605924 | <i>LOC143678</i> | 54,995                |                                                                                                                                                                                                                                                                                                                                      |               |                                                       |                                                                                                                                                                                                                                                  |                |             |                |               |                                 |
| rs11605924 | <i>PEX16</i>     | 58,130                | Integral peroxisomal membrane protein                                                                                                                                                                                                                                                                                                |               |                                                       |                                                                                                                                                                                                                                                  |                |             |                |               | 9837814                         |
| rs11605924 | <i>GYLTL1B</i>   | 70,105                | Glycosyltransferase which participates in glycosylation of alpha-dystroglycan<br><br>Placenta, pancreas, mammary gland, and kidney                                                                                                                                                                                                   |               |                                                       |                                                                                                                                                                                                                                                  |                |             |                |               | 15661757<br>15752776            |
| rs11605924 | <i>PHF21A</i>    | 77,780                | Component of the BHC complex, a corepressor complex that represses transcription of neuron-specific genes in non-neuronal cells                                                                                                                                                                                                      |               |                                                       | <b>Other systems:</b> Abnormal suckling behavior; neonatal lethality                                                                                                                                                                             |                |             |                |               | 16684532                        |
| rs10885122 | <i>ADRA2A</i>    | 201,523               | $\alpha_{2A}$ adrenergic receptor, neurotransmitter and potassium channel regulator<br>Pancreas                                                                                                                                                                                                                                      |               |                                                       | <b>Metabolism/homeostasis:</b> Abnormal glucose homeostasis; hypoglycemia<br><b>Cardiovascular:</b> Abnormal blood pressure; cardiac hypertrophy; abnormal heart rate<br><b>Other systems:</b> Embryogenesis phenotype; nervous system phenotype |                |             |                |               | 8670421<br>10385696<br>10334470 |
| rs10885122 | <i>SHOC2</i>     | 268,671               | Leucine-rich repeat protein SHOC-2, a positive modulator of the RAS pathway                                                                                                                                                                                                                                                          |               |                                                       |                                                                                                                                                                                                                                                  |                |             |                |               | 16301319                        |
| rs174550   | <i>FADS1</i>     | Intronic              | Member of the fatty acid desaturase (FADS) gene family; regulate unsaturation of fatty acids through the introduction of double bonds between defined carbons of the fatty acyl chain Encodes fatty acid desaturase (FADS) enzyme<br><br>Expressed in many tissues, it is most abundant in the liver, brain, adrenal gland and heart |               |                                                       |                                                                                                                                                                                                                                                  |                |             |                |               | 18936223<br>18320251            |
| rs174550   | <i>FEN1</i>      | 6,770                 | Flap endonuclease 1 (FEN-1) is                                                                                                                                                                                                                                                                                                       |               |                                                       | <b>Other systems:</b> Prenatal lethality; absence of the cells of the blastocyst that develop                                                                                                                                                    |                |             |                |               | 12119409                        |

| Lead SNP | Genes in region | Distance to gene (bp) | Function/Expression                                                                                                                                                                                                               | Human Disease        |                                                                            | Mouse Knockout                                                                                                                                                                                                                                               |                |             |                |               | PubMed                           |
|----------|-----------------|-----------------------|-----------------------------------------------------------------------------------------------------------------------------------------------------------------------------------------------------------------------------------|----------------------|----------------------------------------------------------------------------|--------------------------------------------------------------------------------------------------------------------------------------------------------------------------------------------------------------------------------------------------------------|----------------|-------------|----------------|---------------|----------------------------------|
|          |                 |                       |                                                                                                                                                                                                                                   | OMIM                 | Phenotype                                                                  | Metabolism/homeostasis                                                                                                                                                                                                                                       | Adipose tissue | Growth/Size | Cardiovascular | Other systems |                                  |
|          |                 |                       | a nuclear enzyme involved in DNA metabolism, such as replication, repair, and recombination<br><br>Ubiquitously expressed in all tissues                                                                                          |                      |                                                                            | into the body of the embryo; abnormal DNA repair; rapid progression of cancer                                                                                                                                                                                |                |             |                |               | 17589521<br>15189154             |
| rs174550 | C11orf10        | 11,396                | Function unknown<br><br>Expressed in bone marrow, brain, heart, kidney, liver, lung, muscle, placenta, pancreas, spleen, prostate, stomach, testis, thymus, uterus                                                                |                      |                                                                            |                                                                                                                                                                                                                                                              |                |             |                |               | 12427278                         |
| rs174550 | FADS2           | 12,271                | Member of the fatty acid desaturase (FADS) gene family; regulate unsaturation of fatty acids through the introduction of double bonds between defined carbons of the fatty acyl chain Encodes fatty acid desaturase (FADS) enzyme |                      |                                                                            | <b>Cardiovascular:</b> Abnormal PGE2 physiology<br><b>Other systems:</b> Mice homozygous for a null allele display absence of long-chain polyunsaturated fatty acids; infertility; arrest of spermiogenesis and folliculogenesis; impaired platelet function |                |             |                |               | 19172737                         |
| rs174550 | C11orf9         | 15,489                | Transcription regulation                                                                                                                                                                                                          |                      |                                                                            |                                                                                                                                                                                                                                                              |                |             |                |               | 10828591                         |
| rs174550 | FADS3           | 69,521                | Member of the fatty acid desaturase (FADS) gene family; regulate unsaturation of fatty acids through the introduction of double bonds between defined carbons of the fatty acyl chain                                             |                      |                                                                            |                                                                                                                                                                                                                                                              |                |             |                |               | 10860662                         |
| rs174550 | RAB3IL1         | 93,296                | Guanine nucleotide exchange factor for Rab3A, a GTPase that regulates synaptic vesicle exocytosis                                                                                                                                 |                      |                                                                            |                                                                                                                                                                                                                                                              |                |             |                |               | 16189514<br>11516400             |
| rs174550 | BEST1           | 146,349               | Encodes a member of the bestrophin gene family; may form chloride ion channels or may regulate voltage-gated L-type calcium-ion channels<br><br>Predominantly expressed in the                                                    | 153700<br><br>608161 | MACULAR DYSTROPHY, VITELLIFORM; VMD<br><br>MACULAR DYSTROPHY, VITELLIFORM, | <b>Other systems:</b> Mice homozygous for a null mutation exhibit altered eye electrophysiology                                                                                                                                                              |                |             |                |               | 15556645<br>10453731<br>10394929 |

| Lead SNP   | Genes in region | Distance to gene (bp) | Function/Expression                                                                                                                                              | Human Disease        |                                                                                                  | Mouse Knockout                                                                                                                                                                                                                                                                                                                                                                                                                                                                                                                                                                                                          |                |             |                |               | PubMed                        |
|------------|-----------------|-----------------------|------------------------------------------------------------------------------------------------------------------------------------------------------------------|----------------------|--------------------------------------------------------------------------------------------------|-------------------------------------------------------------------------------------------------------------------------------------------------------------------------------------------------------------------------------------------------------------------------------------------------------------------------------------------------------------------------------------------------------------------------------------------------------------------------------------------------------------------------------------------------------------------------------------------------------------------------|----------------|-------------|----------------|---------------|-------------------------------|
|            |                 |                       |                                                                                                                                                                  | OMIM                 | Phenotype                                                                                        | Metabolism/homeostasis                                                                                                                                                                                                                                                                                                                                                                                                                                                                                                                                                                                                  | Adipose tissue | Growth/Size | Cardiovascular | Other systems |                               |
|            |                 |                       | basolateral membrane of the retinal pigment epithelium                                                                                                           | 611809<br><br>193220 | ADULT-ONSET;<br>AVMD<br><br>BESTROPHINOPATHY<br>; ARB<br><br>VITREORETINOCHOR<br>OIDOPATHY; VRCP |                                                                                                                                                                                                                                                                                                                                                                                                                                                                                                                                                                                                                         |                |             |                |               |                               |
| rs174550   | <i>FTH1</i>     | 160,281               | Stores iron in a soluble, non-toxic, readily available form. Important for iron homeostasis.                                                                     |                      |                                                                                                  | <b>Metabolism/homeostasis:</b> Abnormal protein level; abnormal iron homeostasis                                                                                                                                                                                                                                                                                                                                                                                                                                                                                                                                        |                |             |                |               | 3020541                       |
| rs340874   | <i>PROX1</i>    | 2,604                 | Prospero homeobox protein, transcription regulator, co-repressor of hepatocyte nuclear factor 4 $\alpha$                                                         |                      |                                                                                                  | <b>Metabolism/homeostasis:</b> Edema; increased circulating glucagon level; increased circulating insulin level; increased circulating leptin level; abnormal circulating enzyme level; cyanosis; increased triglyceride level<br><b>Adipose tissue:</b> Increased adipose tissue amount ; increased fat cell size; abnormal fat pad morphology<br><b>Growth/Size:</b> Increased susceptibility to age related obesity<br><b>Cardiovascular:</b> Cardiovascular system phenotype; abnormal lymph circulation; abnormal lymph circulation; chylothorax<br><b>Other systems:</b> Abnormal suckling behavior; hypoactivity |                |             |                |               | 16488887                      |
| rs11920090 | <i>SLC2A2</i>   | Intronic              | GLUT2, mediates facilitated bidirectional glucose transport, "glucose sensor"<br><br>Pancreas, kidney, liver, intestine                                          | 227810               | FANCONI-BICKEL SYNDROME                                                                          | <b>Metabolism/homeostasis:</b> Hyperglycaemia; Abnormal glucose homeostasis; Increased circulating glucagon; decreased circulating insulin; abnormal glucose tolerance; abnormal lipid homeostasis; increased fatty acid level; Abnormal pancreatic islet morphology,; decreased pancreas weight<br><b>Growth/Size:</b> Decreased body weight                                                                                                                                                                                                                                                                           |                |             |                |               | 9354799<br>11044475           |
| rs7034200  | <i>GLIS3</i>    | Intronic              | GLI-similar zinc finger protein, repressor/ activator of transcription, involved in the development of pancreatic beta cells, the thyroid, eye, liver and kidney | 610199               | DIABETES MELLITUS, NEONATAL, WITH CONGENITAL HYPOTHYROIDISM                                      |                                                                                                                                                                                                                                                                                                                                                                                                                                                                                                                                                                                                                         |                |             |                |               | 14500813                      |
| rs35767    | <i>IGF1</i>     | 1,153                 | Insulin-like growth factor, growth factor and hormone activity                                                                                                   | 608747               | INSULIN-LIKE GROWTH FACTOR I DEFICIENCY IGF1                                                     | <b>Metabolism/homeostasis:</b> Increased circulating growth hormone level; abnormal glucose Homeostasis; decreased circulating glucose level; increased circulating insulin level; insensitivity to growth hormone<br><b>Growth/Size:</b> Growth retarded; abnormal body size; Decreased length; postnatal slow weight gain<br><b>Other systems:</b> Perinatal death with many immature organ systems; respiratory, nervous, skeleton and muscle phenotypes depending on background of partial knockouts.                                                                                                               |                |             |                |               | 8402901<br>9731712<br>8276243 |
| rs4675095  | <i>IRS1</i>     | Intronic              | Major insulin receptor substrate which may play an important                                                                                                     | 125853               | DIABETES MELLITUS, NONINSULIN-                                                                   | <b>Metabolism/homeostasis:</b> Impaired glucose tolerance, and mild insulin and IGF-1 resistance                                                                                                                                                                                                                                                                                                                                                                                                                                                                                                                        |                |             |                |               | 1385403                       |

| Lead SNP   | Genes in region | Distance to gene (bp) | Function/Expression                                                                                   | Human Disease |                                                                | Mouse Knockout                                                                                                                                                             |                |             |                |               | PubMed   |
|------------|-----------------|-----------------------|-------------------------------------------------------------------------------------------------------|---------------|----------------------------------------------------------------|----------------------------------------------------------------------------------------------------------------------------------------------------------------------------|----------------|-------------|----------------|---------------|----------|
|            |                 |                       |                                                                                                       | OMIM          | Phenotype                                                      | Metabolism/homeostasis                                                                                                                                                     | Adipose tissue | Growth/Size | Cardiovascular | Other systems |          |
|            |                 |                       | role in insulin signal transmission<br><br>Overexpressed in skeletal muscle, and adipocytes           | 147545        | DEPENDENT<br><br>CORONARY ARTERY DISEASE,<br>SUSCEPTIBILITY TO | <b>Growth/Size:</b> 50 percent reductions in body weights at birth and at 4 months of age                                                                                  |                |             |                |               |          |
| rs11071657 | <i>FAM148B</i>  | 21,775                | May play a role in regulating genes which control cellular architecture                               |               |                                                                |                                                                                                                                                                            |                |             |                |               | 15527968 |
| rs11071657 | <i>FAM148A</i>  | 70,853                | May play a role in regulating genes which control cellular architecture                               |               |                                                                |                                                                                                                                                                            |                |             |                |               | 15527968 |
| rs11071657 | <i>VPS13C</i>   | 81,315                | Encodes chorein, a protein similar to yeast Vps13p<br><br>Ubiquitous expression                       |               |                                                                |                                                                                                                                                                            |                |             |                |               | 15498460 |
| rs6479526  | <i>PTPDC1</i>   | Intronic              | Function not yet determined. Protein contains a characteristic motif of protein tyrosine phosphatases |               |                                                                |                                                                                                                                                                            |                |             |                |               | 17971504 |
| rs6479526  | <i>BARX1</i>    | 112,982               | Encodes a member of the Bar subclass of homeobox transcription factors                                |               |                                                                | <b>Other systems:</b> Mice homozygous for a null mutation die around E13 embryonic stage. Prior to death, embryo shows shrunken and malformed stomach but normal intestine |                |             |                |               | 15809042 |

SUPPLEMENTARY FIGURE LEGENDS:

Supplementary Figure 1: Flow chart detailing the study design.



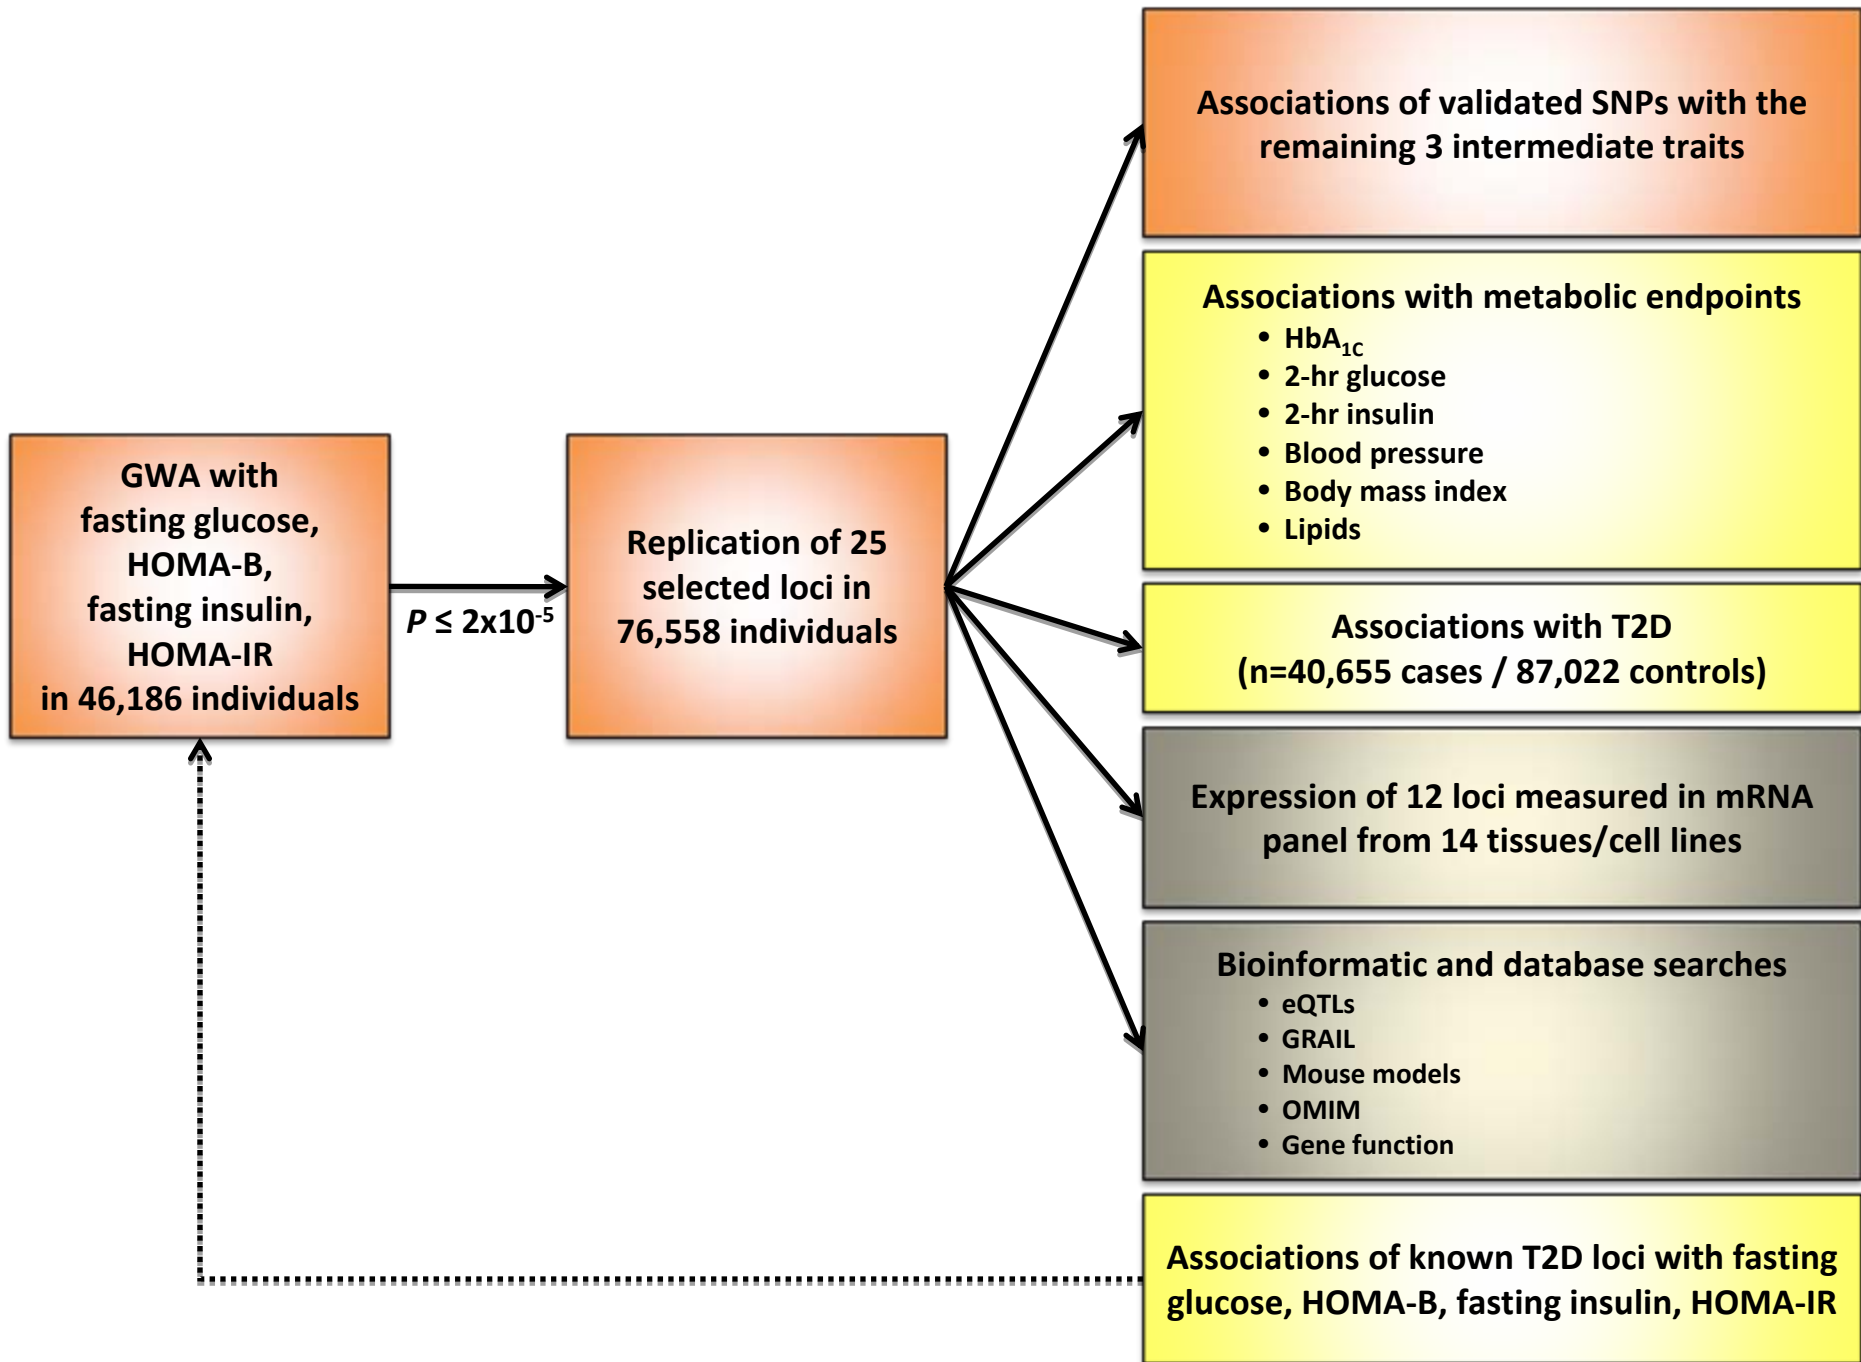

Supplementary Figure 2: Manhattan plots of the association  $P$  values for fasting glucose (a),  $\beta$ -cell function by homeostasis model assessment (HOMA-B) (b), fasting insulin (c) and insulin resistance by homeostasis model assessment (HOMA-IR) (d). Directly genotyped and imputed single nucleotide polymorphisms (SNPs) are plotted with their meta-analysis  $P$  values (as  $-\log_{10}$  values) as a function of genomic position (NCBI Build 35). The SNPs that achieved genome-wide significance ( $P < 5 \times 10^{-8}$ ) on replication are shown in red.

*a.*

*Fasting glucose*

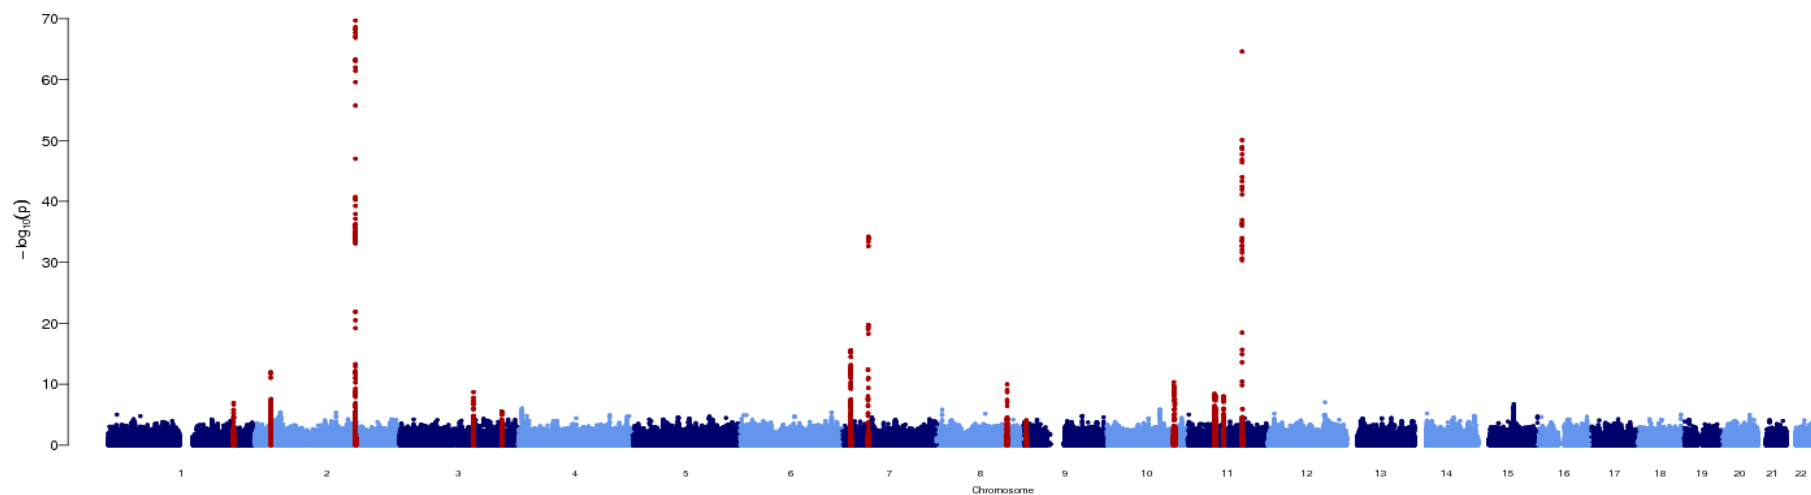

*b.*

*HOMA-B*

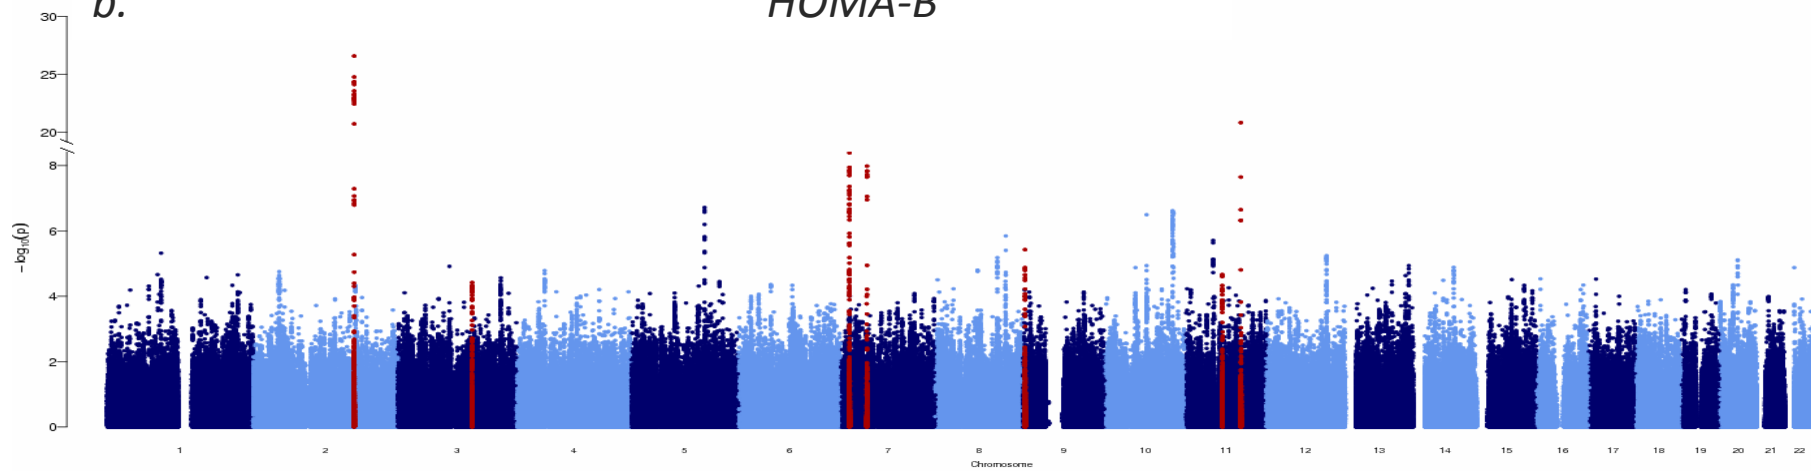

*c.*

*Fasting insulin*

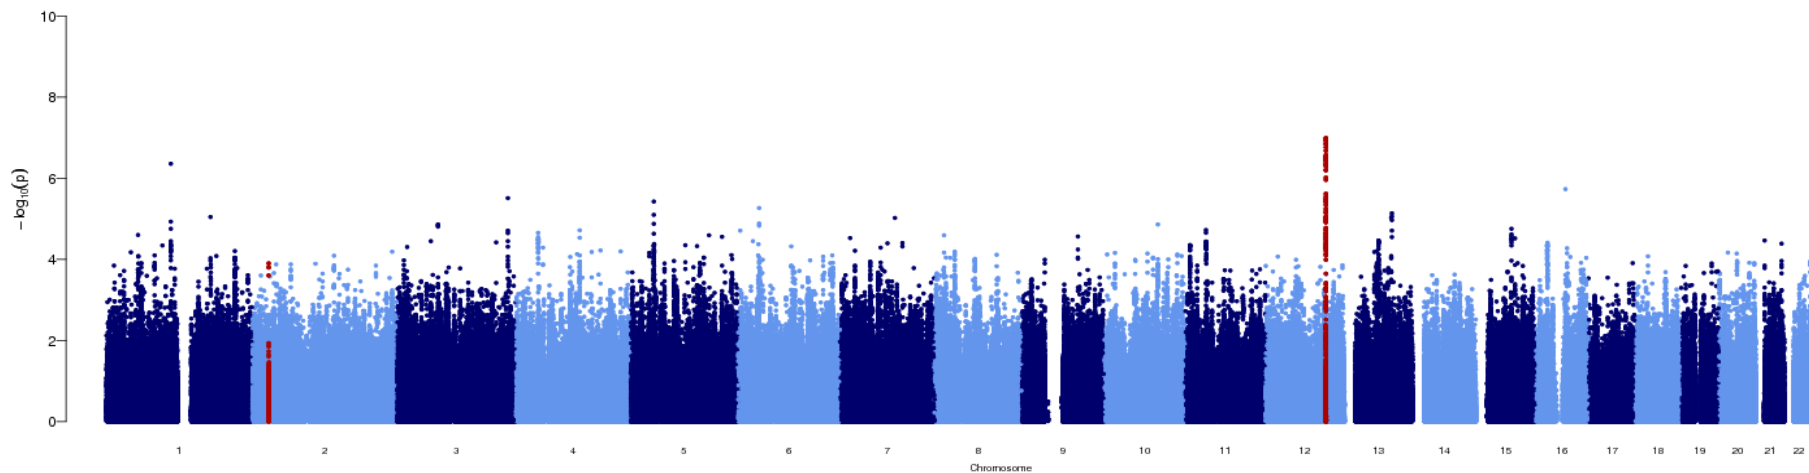

*d.*

*HOMA-IR*

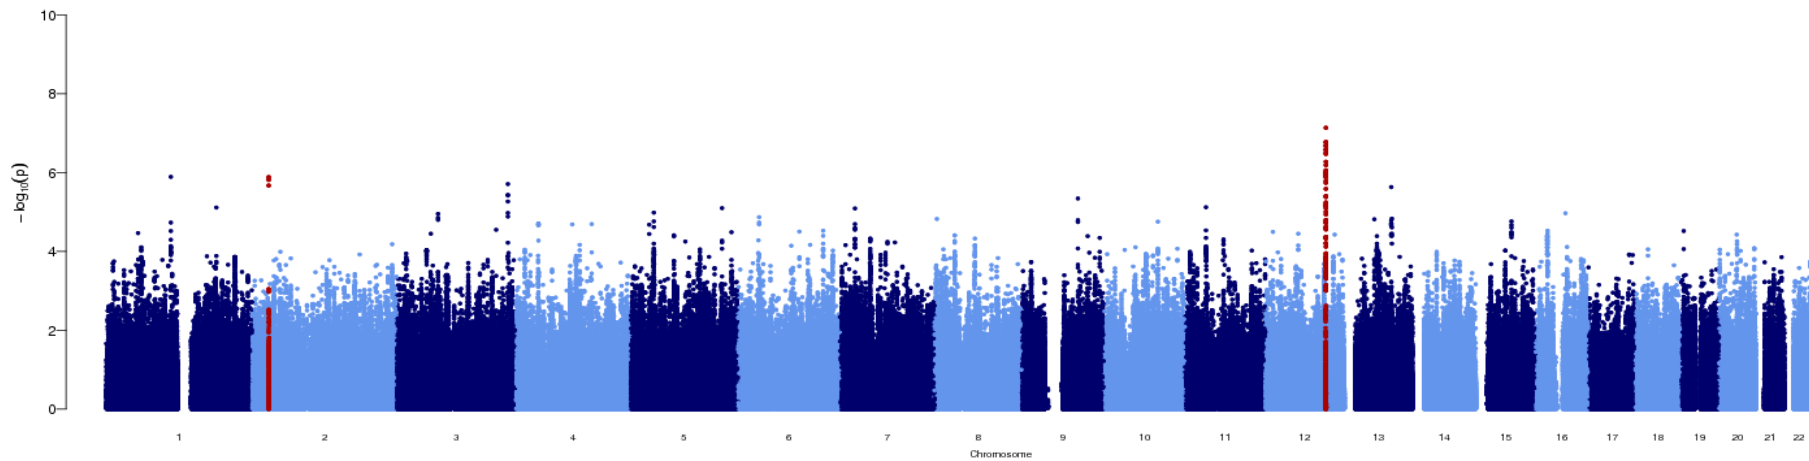

Supplementary Figure 3: Variation in levels of fasting glucose (FG, mmol/L) at novel loci by genotype at each individual locus estimated in 48 cohorts.

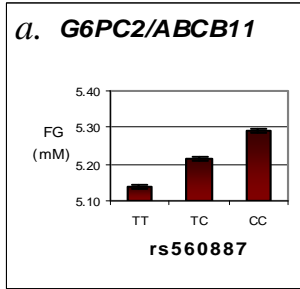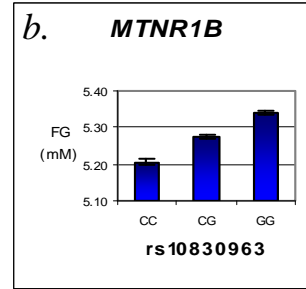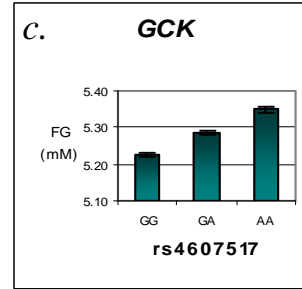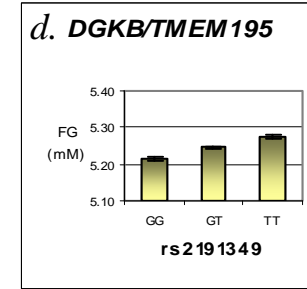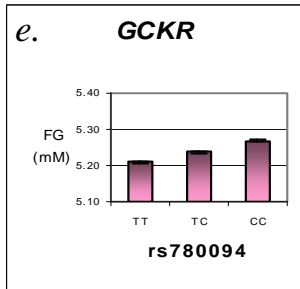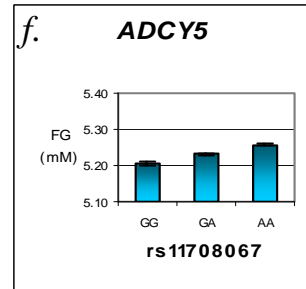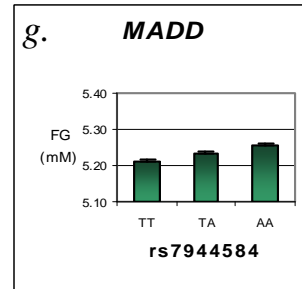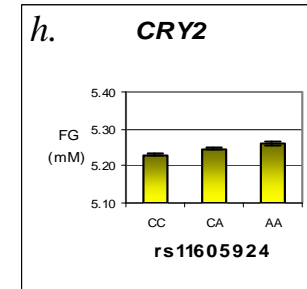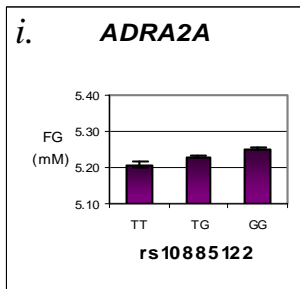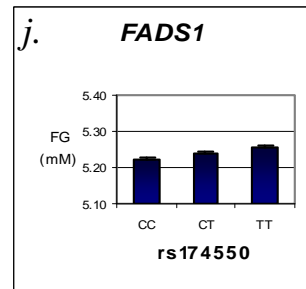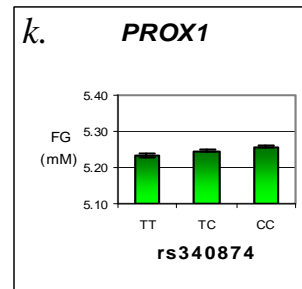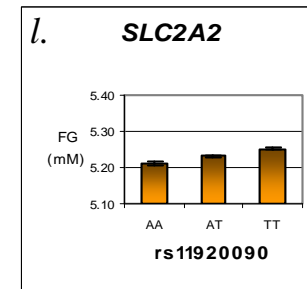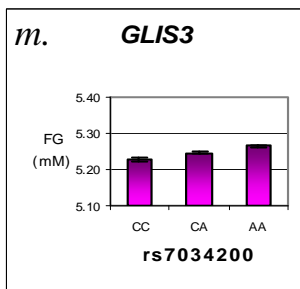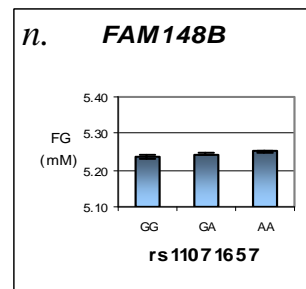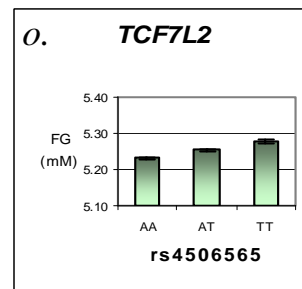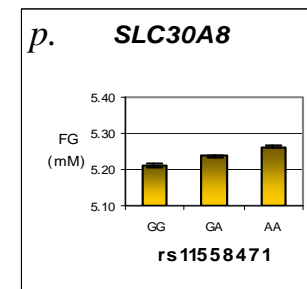

Supplementary Figure 4: (a) Expression of novel fasting glucose and insulin-associated transcripts in various human tissues. The data have been normalized to the tissue showing the highest expression for each novel locus. (b) Duplicate experiment in a separate laboratory. (c) Expression pattern of fasting glucose-associated loci in human flow-sorted  $\beta$  cells. cDNAs from two human donors were reverse transcribed and relative expression measured by quantitative PCR. All samples were run in triplicate and normalized to the  $\beta$  actin relative expression level.

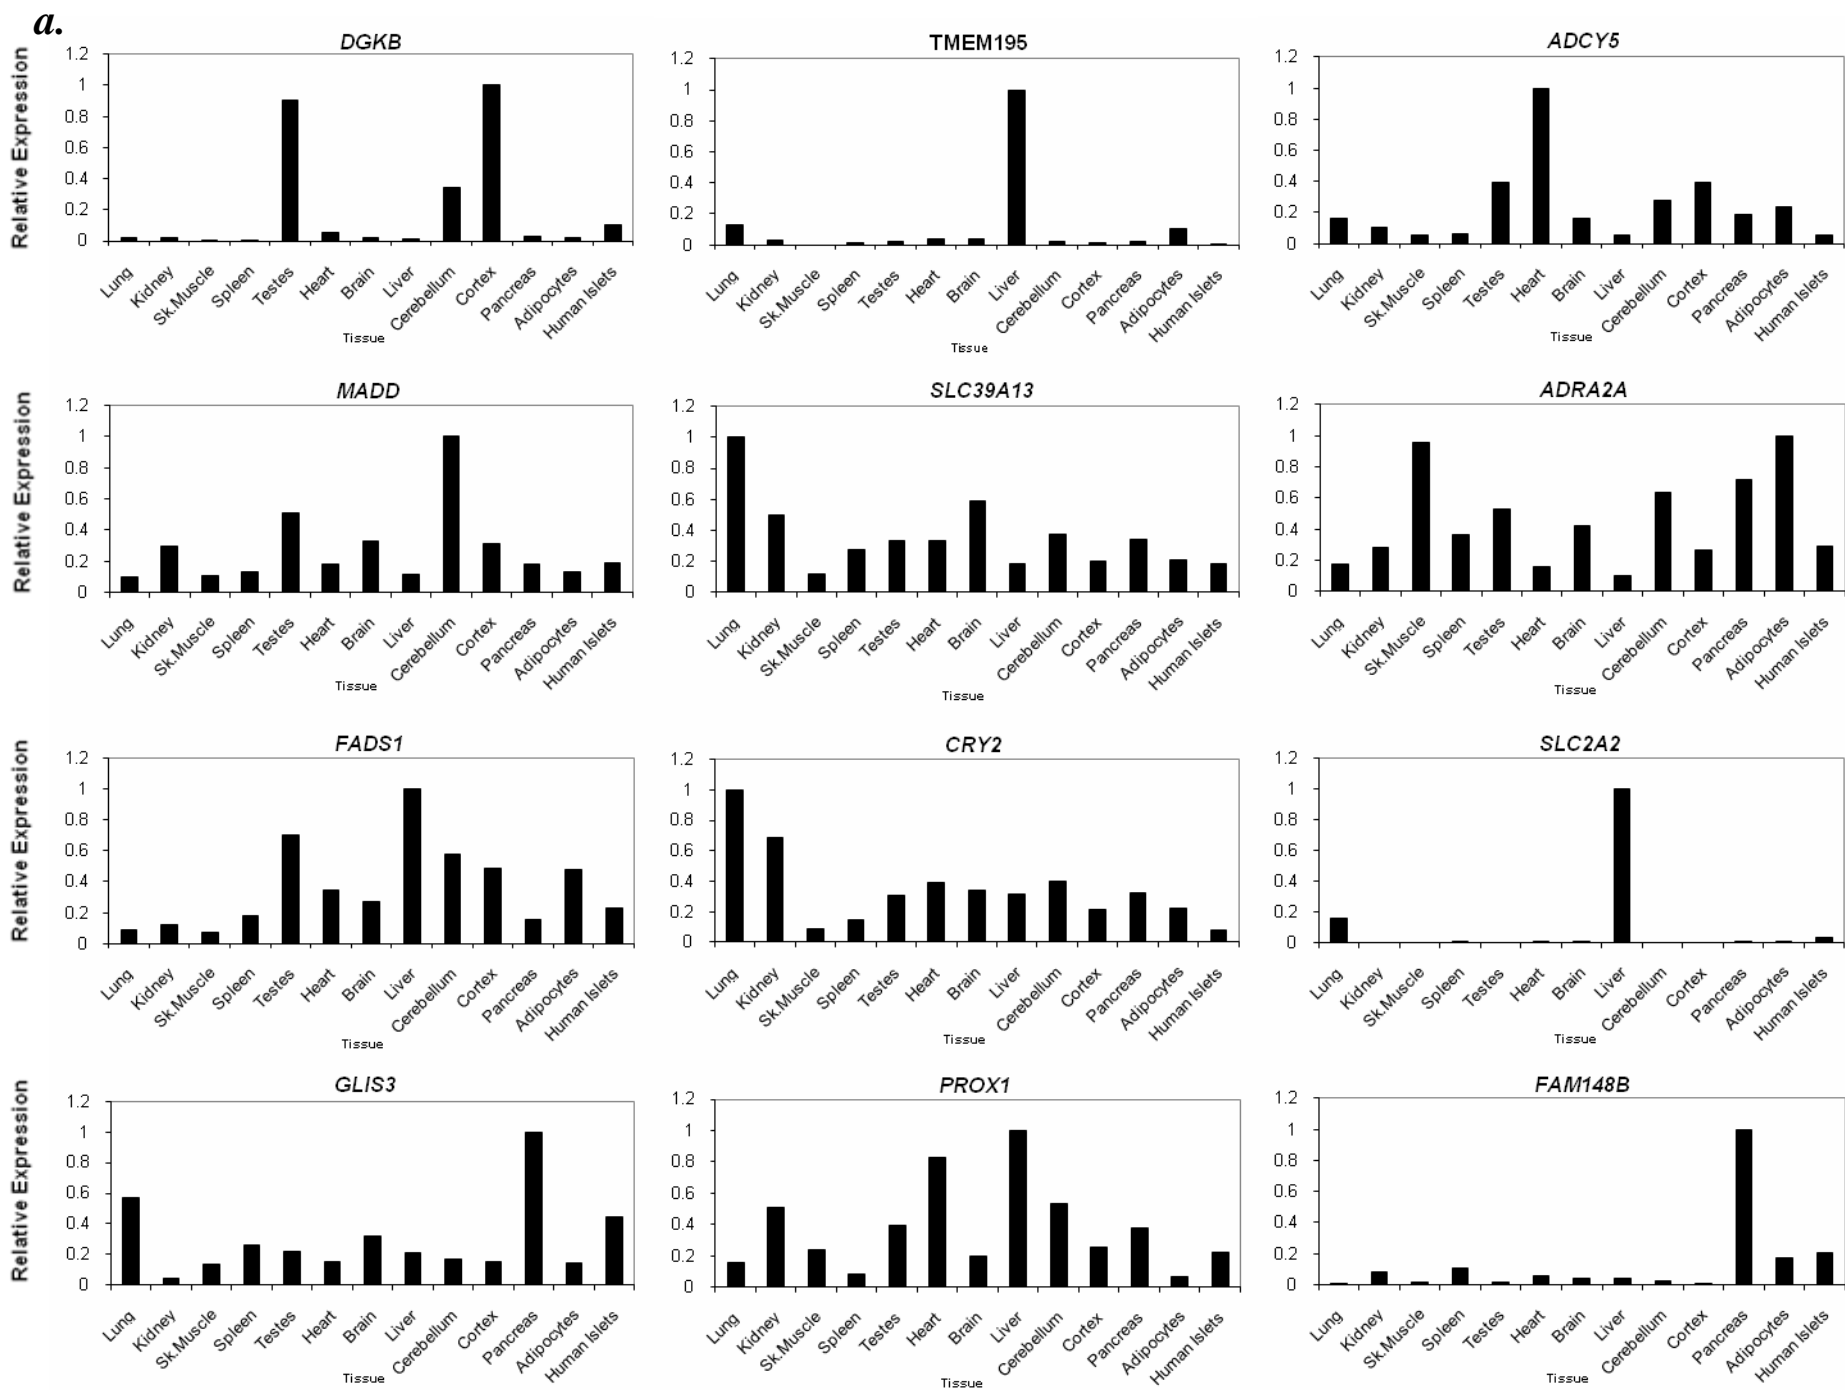



**b.**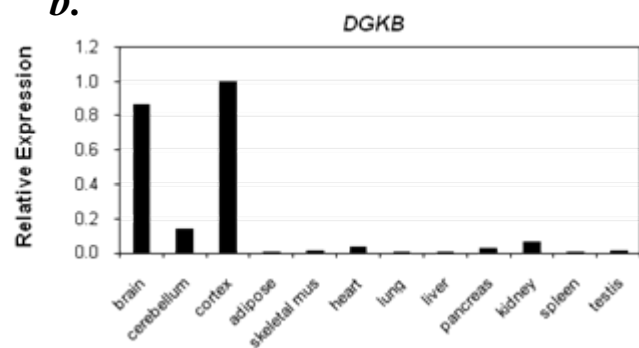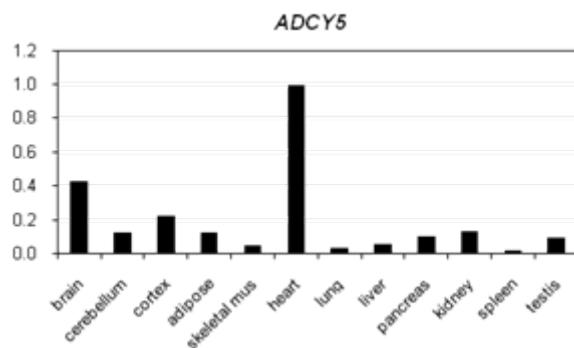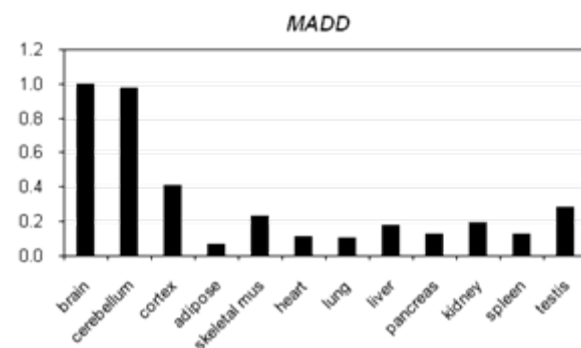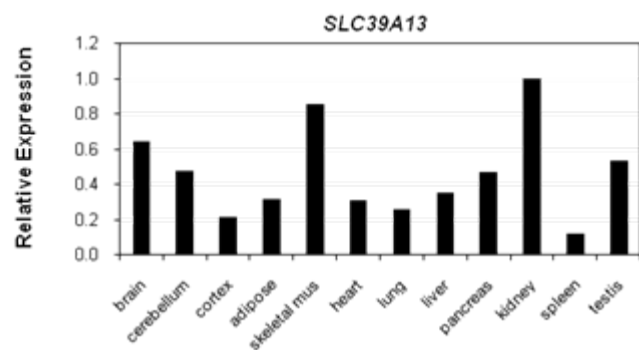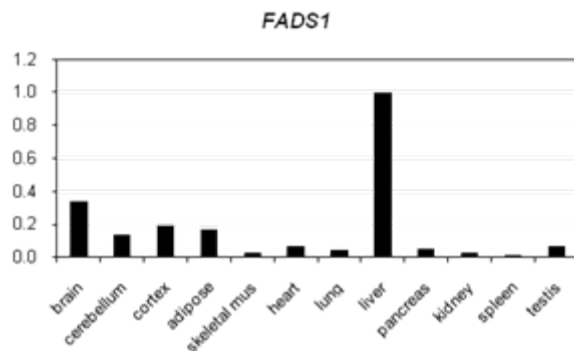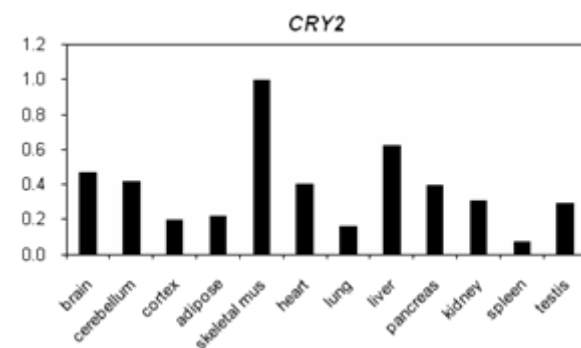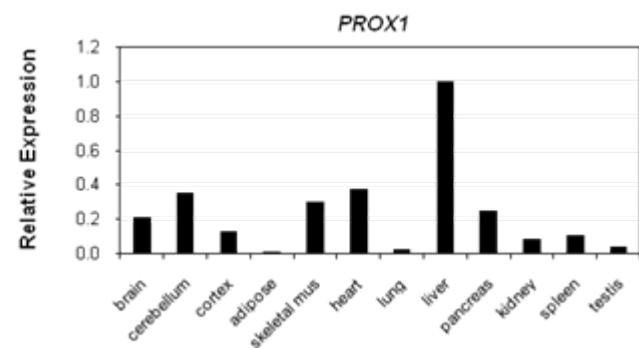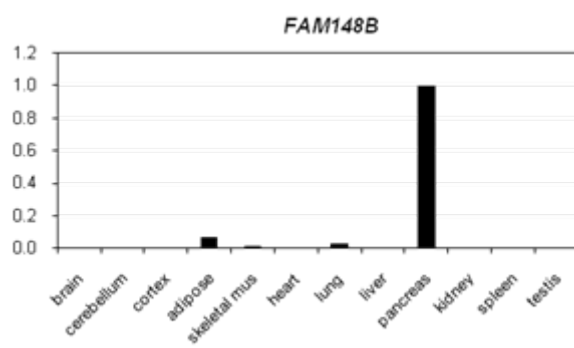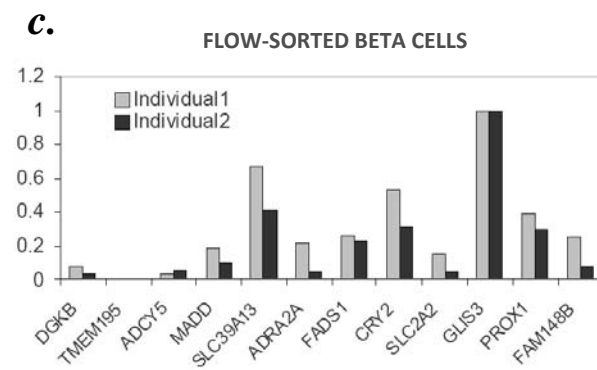

Supplement: NIHMS259059-supplement-1.pdf [file NIHMS259059-supplement-1.pdf]
